Title: Transcriptome and Proteome analysis of *Hemidactylus frenatus* during initial stages of tail regeneration.

Short title: Regeneration in gecko tail

Sai Pawan, Sarena Banu, Mohammed M Idris\*

Sai Pawan, Project based Student, CSIR-CCMB, Uppal Road, Habsiguda, Hyderabad 500007. Email: n.sai.pawan325@gmail.com

Sarena Banu, Project Assistant, CSIR-CCMB, Uppal Road, Habsiguda, Hyderabad 500007. Email: sarena@ccmb.res.in

Mohammed M Idris, Senior Principal Scientist, CSIR-CCMB, Uppal Road, Habsiguda, Hyderabad 500007. Email: idris@ccmb.res.in

\*Corresponding Author

Key words: Transcriptome; Proteome; Regeneration; Gecko; Network pathway

Abstract:

Epimorphic regeneration of appendages is a complex and complete phenomenon found in selected animals. *Hemidactylus frenatus*, the common house gecko has the remarkable ability to regenerate the tail tissue upon autotomy involving epimorphic regeneration mechanism. This study has identified and evaluated the molecular changes at gene and protein level during the regeneration of tail tissue. Based on next generation transcriptomics and *De novo* analysis the transcriptome and proteome library of the gecko tail tissue was generated. A total of 417 genes and 128 proteins were found to be associated with the regeneration of gecko tail tissue upon amputation at 1, 2 and 5-day post amputation against control, Odpa through differential analysis. The differentially expressed genes and proteins expressed a similar pattern for the commonly identified 36 genes/proteins involved in regeneration of the tail tissue. Similarly, the expression analysis of 50 genes were further validated involving real time PCR to authenticate the transcriptomics analysis. 327 genes/proteins identified from the study showed association for GP6 signaling pathway, Protein kinase A signaling, Telomerase signaling BAG2 signaling, paxiling signaling, VEGF signaling network pathways based on network pathway analysis. This study empanelled list of genes/proteins associated with tail tissue regeneration and its association for the mechanism.

## INTRODUCTION

Regeneration is a sequential process specifically controlled by cellular mechanisms to repair or replace tissue or organ from an injury. The mass of undifferentiated cells (blastema) surrounding the injured tissue results in the formation of fully functional replica which enacts the phenomenon of epimorphic regeneration [1]. The ability to regenerate a full limb is absent in mammals but urodeles; teleost and amniotes have the propensity to replace limbs, spinal cords, nervous system, heart, tail and, other body parts [2]. To understand the mechanistic framework of regeneration, researchers have been majorly associated with urodeles amphibians [3]; teleost fishes [4]. Though amniotes i.e. lizards are closely related to mammals and other vertebrates, very little attention has been given to carry out regeneration on this organism [2], [5].

Lizard capacity to self-detach or amputate their tail in flight response from predators is known as the shedding of the tail or caudal autotomy [6]. These stages include exudation of excessive blood loss; minimizing muscle and bone tissue damage; controlled vascularisation; promotes wound epithelium and further unsegmented remodelling [7]. The Detachment of tail activates multiple cellular responses which spurts the blastema mediated cell proliferation, angiogenesis, remodelling and generating a replacement. Studies related to the patterning of successful regenerated autotomized tail or replica consists mainly of nerve cells networking, unsegmented cartilaginous, muscle cells, blood vessels and differential remodelling of cells which make this an interesting research to comprehend the cellular and molecular mechanisms associated with the development [8]–[10]. With the elucidation of the genes and their associated proteins involved in regeneration, there can be a possibility of understanding why in humans regeneration is restricted as compared to amniotes. This also might pave in giving insights into spinal injuries and the fabrication of replacement therapies [11]. Research on the regeneration of tail and its governing molecular mechanism in other lizard species like *Hemidactylus falviviridis* [12]; Green Anole [13-14]; and other vertebrates axolotl [15-17] have been carried out related to histology, proteomics and genomics [12 - 17]. Though many genes or proteins have been known still the underlying mechanisms of these molecules remains ambiguous. The present study is novel on this species “*Hemidactylus frenatus*” [18] commonly known as “Common House Gecko”. They are widely accessible, have a short life span and can be housed with minimal requirements and maintenance conditions. These species have been studied generally for their behavioural, habitat diversification and regenerative abilities [7], [19–22].

Lately, molecular and gene-specific studies focus on the role of genes like SOX9, PAX7, BMP, FGF, Wnt, MMP's which are usually associated with regeneration [23]. The expression of SOX9 during cartilage formation, PAX7 associating in tissue morphogenesis [24], BMP6 and other protein expressions were known [25, 26]. Constitutive expression and regulation of these genes have revealed a significant role during the developmental stages of regeneration. The slight alteration in the regulation of any of these genes results in a disrupted replacement. Thus, the activation and intricate cross-talk of these molecules during the process are still unaddressed and need to be better understood.

In this research, we sought to understand the molecular mechanisms of lost tail regeneration process during preliminary stages (0dpa, 1dpa, 2dpa, and 5dpa) which would further help in understanding the molecular cues and the genes or proteins associated with the process. The initial stages (i.e. wound healing) are responsible for wound epithelium and initiating apical epidermal cap (AEC) which regulates blastema formation [7]. Though, during the initial stages, the activity of the molecules regulating the regeneration process is not known which is crucial to instigate the replacement of the lost tissue. The study of prelude stages of regeneration has been carried out in zebrafish caudal fin [27]; other species [28] and shown changes in the regulation of genes or proteins. However, this stage-specific study has not been carried out in this species and as it is necessary for deciphering the crucial molecules which kick starts the regenerative mechanism in these amniotes. Here, we list out the involvement of crucial genes or proteins and their differential expression associated with the molecular processes in tail regeneration through transcriptome and proteome approaches.



## **MATERIALS AND METHODS**

### **1. Animal and Sample Collection**

The lizard, *Hemidactylus frenatus* were collected and maintained in a well-ventilated cage with adequate proper diet, optimum temperature (~25°C) and the 12 hours light and dark cycle. Amputation of tail tissue were performed on batches of animals using sterile scalpel blade. Regenerating tail tissues preceding the amputation site were collected for each time points (0dpa, 1dpa, 2dpa, 5dpa) of (n=5). The collected control and regenerating tail tissues were washed with 1X phosphate-buffered saline (PBS), pooled and snap-frozen in liquid nitrogen and was store at -70°C until use. The animal experiment were performed in accordance with the protocol approved by the Institutional animal ethics committee of Centre for Cellular and Molecular Biology (IAEC/CCMB/Protocol # 66/2014).

### **2. Total RNA Isolation**

Total RNA was extracted from the tissues of each time points using RNA isoPlus Reagent (Takara Bio, CA, USA) following the manufacturer's protocol. The RNA yield and purity was calculated using NanoDrop 2000 Thermo fisher and gel analysis.

### **3. NGS transcriptomic analysis**

The total RNA transcripts of each time point tissues were obtained based on next generation sequencing (NGS) analysis involving Illumina HiSeq 2000 [28]. All the transcripts obtained commonly from all the tissues were further assembled for De novo transcriptome analysis and functional annotation against non-redundant reptilian database using blastx [28]. Both the known and unknown gene sequences obtained from the NGS analysis were tabulated and submitted to NCBI and obtained accession number. Also the genes were translated for obtaining protein database.

### **4. Differential expression analysis**

The transcripts were further analysed for their expression level using FPKM and analysed for differential expression level on 1, 2 and 5dpa time points against 0dpa as control [28]. Differentially expressed transcripts having at least 1.0 log fold change in any one of their regenerating time points were considered for the study.

### **5. Real Time PCR (RT-PCR) analysis**

Validation of fifty most significantly expressed genes having more than 2 log fold changes in any of its time points were selected for RTPCR analysis. Primers were designed using Primer3 software. Amplification of 14-3-3 protein zeta/delta isoform X1 and NADH dehydrogenase 1 alpha sub complex subunit 11 were used as housekeeping gene. RTPCR were performed in biological and technical replicates for each genes from the cDNA synthesized from 1 µgms total RNA using Takara SYBR green assay master mix. The relative expressions of the genes were estimated based on the RTPCR Ct value against control (0dpa) as the baseline.

## **6. Protein extraction and iTRAQ analysis**

The total protein from the control and regenerating tail tissues were extracted using protein extraction buffer (7M urea, 2M thiourea, 18mM Tris-HCl, 4% CHAPS, 14mM Trizmabase, 2 Tablets EDTA protease Inhibitor, Triton X 0.2%, 50mM DTT) upon homogenization and sonication [27, 29]. The proteins were quantified using Amido black method [30] against BSA as standard. iTRAQ based quantitative proteomics analysis was performed in duplicates between the control (0dpa) and regenerating time points (1dpa, 2dpa and 5dpa) by loading 50 µg of total proteins in a 10% SDS-PAGE gel. The gel was stained, destained, documented and fractionated into four sequential groups. The gel fractions were washed; trypsin digested, labelled with isobaric tags iTRAQ 4-plex labelling and purified with the help of C-18 spin columns (Thermo Scientific). The purified/labelled peptides were vacuum dried and constituted in 5% acetonitrile (ACN) and 0.2% formic acid to the peptides for the LCMS/MSMS analysis [28]. The LCMS/MSMS run was performed in Orbitrap Velos Nano analyzer (Thermo) involving High Collision Dissociation (HCD) mode of acquisition with 50% normalized collision energy. The raw files were analyzed with Sequest HT proteome discoverer 1.4 (Thermo Scientific), with 1% FDR using percolator and XCorr (Score Vs Charge) against the NGS generated lizard database. All the proteins, in duplicates, were analyzed against the control (0dpa). Differentially regulated expression by more than 1-log fold changes were selected as proteins associated with regeneration.

## **7. Heat Map and Network Pathway analysis :**

All the differentially expressed genes and proteins were analysed for the heat map analysis involving heatmapper portal ([www.heatmapper.ca](http://www.heatmapper.ca)) towards elucidating the hierarchical cluster analysis of the genes/proteins and the time points. The association of these genes /

proteins were also analyzed for the association in network pathways based on Ingenuity pathway analysis (IPA).

## **Results:**

### **Transcriptomic analysis of regeneration:**

A total of 42551 transcripts sequences were obtained from the NGS analysis of all four tail tissue samples. All the sequences were obtained from a total of ~ 30 million reads from each sample. De novo and functional annotation yielded 39953 transcripts with highest similarity with *Gekko japonicas* (41.3%) and no blast hit (49%) to any reptilian database. The transcripts were submitted to NCBI and obtained accession number (SUB6511228). The transcripts were further translated to obtain the protein sequence database for proteomic analysis.

A total of 417 genes were found to be associated with regeneration of gecko tail tissue for having at least one log fold change in one of its regenerating time points significantly. 254 genes were selected for further analysis such as heat map and network pathway analysis for having their expression pattern in all their regenerating time points (Figure 1a; Table 1). Genes such as Erythrocyte membrane protein (EPB41), retinoic acid receptor responder protein 1 and few uncharacterized proteins were found to be upregulated for having more than 5 log fold upregulation of gene expression. Similarly, Ryanodine receptor 1, Myosin 1B were found to be regulated austere (Table 1). Clustal hierarchical heat map analysis of the differentially regulated genes revealed group of genes which were undergoing upregulation at 1dpa where found to be down regulated at 2 and 5dpa and vice versa with down regulated genes at 1dpa (Figure 1a). The analysis further reveals that 1dpa expression is out rooted with clustered 2 and 5dpa based on cluster analysis for the three regenerating time points against the control tissue expression.

### **Proteomic analysis of regeneration:**

A total of 128 proteins were found to be differentially regulated during the early stage of regeneration of gecko tail tissues for having minimum of one log fold changes significantly (Table 2). Annexin A2, Cathepsin B and MYL1 were some of the major upregulated proteins and Myozenin, GST and GSK were the major down regulated proteins. A total of 36 proteins which were differentially regulated at the proteome level were also found to be differentially regulated at gene level based on the transcriptomics analysis (Figure 1c). Like transcriptome expression pattern, proteome expressions were also found to be associated with regeneration by clustering of 2 and 5dpa (Figure 1d). All the proteins which were upregulated

at 1 dpa were found to be down regulated either at 2 or 5 dpa. Similarly all the down regulated proteins were found to be upregulated at 2 or 5 dpa.

### **Validation of gene expression:**

RTPCR analysis of 50 genes selected for the validation study showed significant differential expression of the genes for the regeneration mechanism (Figure 2a and 2b). Almost all the up and down regulated genes which were identified from the transcriptomic analysis were found to be associated with regeneration through differential regulation based on RTPCR analysis (Figure 1b). Heat map analysis of the gene expression based on RTPCR analysis also showed association of 2 and 5 dpa as cluster against 1 dpa expression.

### **Network Pathway Analysis:**

A total of 327 genes/proteins were mapped by the Ingenuity Pathway analysis software for the network and pathway analysis. The major molecular and cellular functions associated with the differentially regulated genes/proteins during regeneration are cellular assembly & organization, cellular compromise, cellular functions & maintenance and Cellular development. The major physiological system development and functions associated with regeneration mechanism are skeletal & muscular system development, embryonic development, organ development and tissue development.

The most significant canonical pathways which were found to be associated with genes/proteins were GP6 signaling pathway, Protein kinase A signaling, Telomerase signaling BAG2 signaling, paxiling signaling, VEGF signaling and various metabolic pathways (Figure 3a). The major network pathways associated with the identified and dysregulated genes/proteins based on differential analysis includes Cell morphology and Embryonic development (Figure 3b), Cellular assembly and organization (Figure 3c), Organ and organismal development (Figure 3d) and Skeletal and Muscular development (Figure 3e).

## **Discussion:**

This study aimed to evaluate the genomic and proteomic changes during the early stages of tail tissue regeneration in house lizard. Zebrafish and other invertebrates have been extensively studied for understanding the epimorphic regeneration [27, 28] at the genomic and proteomic level. This study has been done similar to our earlier study using the house gecko as the model animal.

The study not only mapped the transcriptome of gecko tail tissue but also identified the list of genes and proteins involved in regeneration of the tail tissue upon amputation. Several known and unknown genes/proteins which were identified in this study were also involved in epimorphic regeneration of caudal fin tissue of zebrafish [27]; arm of brittle star [28] and tail of *Hemidactylus flaviviridis* [12]. 417 genes and 134 proteins were identified as differentially regulated in the regenerating tissues. Validation of 50 genes identified from the transcriptomic analysis confirms the differential regulation of the genes for the biomechanism of regeneration, which is also evident from the hierarchical heat map analysis of the transcriptome and proteome and RTPCR expression analysis.

The canonical pathway associated with the differentially expressed genes/proteins are mostly signalling and metabolic pathways. The major network pathways associated with the tail tissue regeneration are Cell morphology, embryonic development and skin development (Figure 3b) involving 26 genes/proteins of the study such as DSC1, DSC2, GPI, DSP and keratin proteins. Similarly, 25 genes/proteins, such as ADRM1, APOA1, ASPH, ATP2A1 were associated with Cellular assembly and organization (Figure 3c). Organ and organismal development network pathway (Figure 3d) were associated with 28 genes/proteins such as ACTC1, ACTG1, BIN1, CAPZA2 and CAPZB. Skeletal and muscular system development network pathway (Figure 3e) was associated with 25 genes/proteins such as CBR1, DLX3, EEF1B2 and DLX3. This study has identified and associated various genes/proteins and their network pathways for the tail tissue regeneration of lizard which were also found to be associated with epimorphic regeneration of organs in other animals as in zebrafish [27] and echinoderms [28]. Further understanding of the differential expressed genes/proteins and their regulation might lead to better insight in understanding the regeneration of the gecko tail.

### Acknowledgements:

This work was supported by CSIR-YSA Project. The authors are grateful to Noorul Fowzia for critically reviewing the manuscript.

## REFERENCES:

1. Londono, R., Sun, A.X., Tuan, R.S. and Lozito, T.P., 2018. Tissue repair and epimorphic regeneration: An overview. *Current pathobiology reports*, 6(1), 61-69.
2. Jacyniak, K., McDonald, R.P. and Vickaryous, M.K., 2017. Tail regeneration and other phenomena of wound healing and tissue restoration in lizards. *Journal of Experimental Biology*, 220(16), 2858-2869.
3. McCusker, C. and Gardiner, D.M., 2011. The axolotl model for regeneration and aging research: a mini-review. *Gerontology*, 57(6), 565-571.
4. Gemberling, M., Bailey, T.J., Hyde, D.R. and Poss, K.D., 2013. The zebrafish as a model for complex tissue regeneration. *Trends in Genetics*, 29(11), 611-620.
5. Alibardi, L., 2010. Morphological and cellular aspects of tail and limb Regeneration in Lizards. A model system with implications for tissue regeneration in mammals. *Adv Anat Embryol Cell Biol*. 207, 1-109.
6. Clause, A.R. and Capaldi, E.A., 2006. Caudal autotomy and regeneration in lizards. *Journal of Experimental Zoology Part A: Comparative Experimental Biology*, 305(12), 965-973.
7. Gilbert, E.A.B., Delorme, S.L. and Vickaryous, M.K., 2015. The regeneration blastema of lizards: an amniote model for the study of appendage replacement. *Regeneration*, 2(2), 45-53.
8. Delorme, S.L., Lungu, I.M. and Vickaryous, M.K., 2012. Scar-free wound healing and regeneration following tail loss in the leopard gecko, *Eublepharis macularius*. *The Anatomical Record: Advances in Integrative Anatomy and Evolutionary Biology*, 295(10), 1575-1595.
9. McLean, K.E. and Vickaryous, M.K., 2011. A novel amniote model of epimorphic regeneration: the leopard gecko, *Eublepharis macularius*. *BMC developmental biology*, 11(1), p.50.
10. Payne, S.L., Peacock, H.M. and Vickaryous, M.K., 2017. Blood vessel formation during tail regeneration in the leopard gecko (*Eublepharis macularius*): the blastema is not avascular. *Journal of morphology*, 278(3), 380-389.
11. Simkin, J., Sammarco, M.C., Dawson, L.A., Schanes, P.P., Yu, L. and Muneoka, K., 2015. The mammalian blastema: regeneration at our fingertips. *Regeneration*, 2(3), 93-105.



12. Murawala, H., Ranadive, I., Patel, S., Desai, I. and Balakrishnan, S., 2018. Protein expression pattern and analysis of differentially expressed peptides during various stages of tail regeneration in *Hemidactylus flaviviridis*. *Mechanisms of development*, 150, 1-9.
13. Fisher, R.E., Geiger, L.A., Stroik, L.K., Hutchins, E.D., George, R.M., Denardo, D.F., Kusumi, K., Rawls, J.A. and Wilson-Rawls, J., 2012. A histological comparison of the original and regenerated tail in the green anole, *Anolis carolinensis*. *The Anatomical Record: Advances in Integrative Anatomy and Evolutionary Biology*, 295(10), 1609-1619.
14. Hutchins, E.D., Markov, G.J., Eckalbar, W.L., George, R.M., King, J.M., Tokuyama, M.A., Geiger, L.A., Emmert, N., Ammar, M.J., Allen, A.N. and Siniard, A.L., 2014. Transcriptomic analysis of tail regeneration in the lizard *Anolis carolinensis* reveals activation of conserved vertebrate developmental and repair mechanisms. *PloS one*, 9(8), p.e105004.
15. Slack, J.M.W., 1982. Protein synthesis during limb regeneration in the axolotl. *Development*, 70(1), 241-260.
16. Kozhemyakina, E., Lassar, A.B. and Zelzer, E., 2015. A pathway to bone: signaling molecules and transcription factors involved in chondrocyte development and maturation. *Development*, 142(5), 817-831.
17. Rao, N., Jhamb, D., Milner, D.J., Li, B., Song, F., Wang, M., Voss, S.R., Palakal, M., King, M.W., Saranjami, B. and Nye, H.L., 2009. Proteomic analysis of blastema formation in regenerating axolotl limbs. *BMC biology*, 7(1), p.83.
18. Patel, H., Naik, V. and Tank, S.K., 2016. The Common House Gecko, *Hemidactylus frenatus* Schlegel in Dumeril & Bibron 1836 (Reptilia: Gekkonidae) in Gujarat, India. *IRCF Reptiles & Amphibians*, 23, 178-182.
19. Rakhmiyati, R. and Luthfi, M.J.F., 2018. Alizarin Red S-Alcian Blue Staining for Regenerated tail of Common House Gecko (*Hemidactylus frenatus*). *Biology, Medicine, & Natural Product Chemistry*, 7(2), 57-59.
20. Rakhmiyati, R. and Luthfi, M.J., 2016. Histological Study of Common House Gecko (*Hemidactylus frenatus*) Regenerated Tail. *Biology, Medicine, & Natural Product Chemistry*, 5(2), 49-53.
21. Carranza, S. and Arnold, E.N., 2006. Systematics, biogeography, and evolution of *Hemidactylus* geckos (Reptilia: Gekkonidae) elucidated using mitochondrial DNA sequences. *Molecular phylogenetics and evolution*, 38(2), 531-545.

22. Maginnis, T.L., 2006. The costs of autotomy and regeneration in animals: a review and framework for future research. *Behavioral Ecology*, 17(5), 857-872.
23. Poss, K.D., Shen, J., Nechiporuk, A., McMahon, G., Thisse, B., Thisse, C. and Keating, M.T., 2000. Roles for Fgf signaling during zebrafish fin regeneration. *Developmental biology*, 222(2), 347-358.
24. Liu, Y., Zhou, Q., Wang, Y., Luo, L., Yang, J., Yang, L., Liu, M., Li, Y., Qian, T., Zheng, Y. and Li, M., 2015. Gekko japonicus genome reveals evolution of adhesive toe pads and tail regeneration. *Nature communications*, 6, p.10033.
25. Yu, Y., Tang, J., Su, J., Cui, J., Xie, X. and Chen, F., 2019. Integrative analysis of microRNAome, transcriptome, and proteome during the limb regeneration of *Cynops orientalis*. *Journal of proteome research*, 18(3), 1088-1098.
26. Quint, E., Smith, A., Avaron, F., Laforest, L., Miles, J., Gaffield, W. and Akimenko, M.A., 2002. Bone patterning is altered in the regenerating zebrafish caudal fin after ectopic expression of sonic hedgehog and *bmp2b* or exposure to cyclopamine. *Proceedings of the National Academy of Sciences*, 99(13), 8713-8718.
27. Saxena, S., Singh, S.K., Lakshmi, M.G.M., Meghah, V., Bhatti, B., Swamy, C.V.B., Sundaram, C.S. and Idris, M.M., 2012. Proteomic analysis of zebrafish caudal fin regeneration. *Molecular & Cellular Proteomics*, 11(6), M111-014118.
28. Purushothaman, S., Saxena, S., Meghah, V., Swamy, C.V.B., Ortega-Martinez, O., Dupont, S. and Idris, M., 2015. Transcriptomic and proteomic analyses of *Amphiura filiformis* arm tissue-undergoing regeneration. *Journal of proteomics*, 112, 113-124.
29. Singh, S.K., Lakshmi, M.G.M., Saxena, S., Swamy, C.V.B. and Idris, M.M., 2011. Proteome profile of zebrafish caudal fin based on one-dimensional gel electrophoresis LCMS/MS and two-dimensional gel electrophoresis MALDI MS/MS analysis. *Journal of separation science*, 34(2), 225-232.
30. Weissmann, S.W., 1973. A rapid for sensitive, the in dilute and Specific of method protein determination solution. *Anal Biochem*, 56, 502-514.

## Legends:

Figure 1: a. Heat map expression of *Hemidactylus frenatus* transcript during tail tissue regeneration b. Heat map expression of various genes differentially regulated during regeneration based on RTPCR analysis; c. Venn diagram for number genes identified from Transcriptomics, proteomics and Real time PCR based gene expression analysis D. Heat map expression of differentially expression proteins which are associated with tail regeneration.

Figure 2: RTPCR analysis of differentially expressed transcripts. a. Gel image of all the 50 genes along with housekeeping gene. b. Bar diagram of expression visualising the up and down regulation of the genes.

Figure 3: a. Canonical Pathway associated with the differentially expressed genes/proteins for tail regeneration; b. Cell morphology and Embryonic development network pathway; c. Cellular assembly and organization network pathway; d. Organ and organismal development network pathway; e. Skeletal and Muscular development network pathway.

Table 1: List of differentially expressed genes based on NGS transcriptomic analysis. Accession, description, symbol, 1dpa fold changes, 2dpa fold changes, 5dpa fold changes, 1dpa p value, 2dpa p values and 5dpa p values were shown in each column.

Table 2: List of differentially expressed protein based on iTRAQ proteomic analysis. Accession, description, symbol, No of peptides identified, peptide sequence matches, 1dpa fold changes, 2dpa fold changes, 5dpa fold changes, 1dpa SEM, 2dpa SEM and 5dpa SEM were shown in each column.

Table 1: List of differentially expressed genes based on NGS transcriptomic analysis. Accession, description, symbol, 1dpa fold changes, 2dpa fold changes, 5dpa fold changes, 1dpa p value, 2dpa p values and 5dpa p values were shown in each column.

| S. No | Accession                | Description                                                                       | Symbol  | 1dpa FC | 2dpa FC | 5dpa FC | 1dpa pval | 2dpa pval | 5dpa pval |
|-------|--------------------------|-----------------------------------------------------------------------------------|---------|---------|---------|---------|-----------|-----------|-----------|
| 1     | TRINITY_DN30805_c0_g3_i3 | Similar to Gekko japonicus uncharacterized LOC107120650                           | N/A     | -3.7    | -3.7    | -6.1    | 0.0       | 0.0       | 0.1       |
| 2     | TRINITY_DN38093_c1_g1_i2 | ADAM metallopeptidase domain 9 (ADAM9), mRNA like                                 | ADAM9I  | -1.7    | -4.6    | -6.1    | 0.2       | 0.0       | 0.1       |
| 3     | TRINITY_DN24480_c0_g2_i1 | 3-hydroxybutyrate dehydrogenase, type 2 (BDH2), transcript variant X2, mRNA       | BDH2    | -1.0    | 3.6     | 2.2     | 1.0       | 0.0       | 0.5       |
| 4     | TRINITY_DN30186_c0_g1_i6 | Prolyl 4-hydroxylase, beta polypeptide (P4HB), transcript variant X1, mRNA        | P4HB    | -1.0    | 3.8     | 5.5     | 1.0       | 0.0       | 0.1       |
| 5     | TRINITY_DN19868_c1_g5_i1 | Transmembrane protein 128 (TMEM128), mRNA                                         | TMEM128 | -0.7    | -2.9    | -7.4    | 0.6       | 0.1       | 0.0       |
| 6     | TRINITY_DN34808_c4_g3_i1 | Isolate DB198 basic leucine zipper and W2 domain-containing protein 1 (BZW1) gene | BZW1    | -0.7    | -3.5    | -5.1    | 0.6       | 0.0       | 0.1       |
| 7     | TRINITY_DN20768_c1_g1_i1 | Ankyrin repeat domain 23 (ANKRD23), mRNA                                          | ANKRD23 | -0.4    | -3.1    | -4.7    | 0.8       | 0.0       | 0.1       |
| 8     | TRINITY_DN36827_c0_g1_i3 | Uncharacterized                                                                   | N/A     | -0.4    | -4.8    | -5.3    | 0.8       | 0.0       | 0.1       |
| 9     | TRINITY_DN22212_c0_g1_i1 | HOXD13 (HoxD13) gene                                                              | HOXD13  | -0.1    | -5.3    | -6.9    | 0.9       | 0.0       | 0.0       |
| 10    | TRINITY_DN26064_c0_g1_i1 | FGB gene for beta-fibrinogen,                                                     | FGB     | -0.1    | -7.6    | -9.2    | 0.9       | 0.0       | 0.0       |
| 11    | TRINITY_DN24344_c0_g1_i2 | Poly(A) binding protein interacting protein 2 (PAIP2)                             | PAIP2   | 0.0     | 3.7     | 2.4     | 1.0       | 0.0       | 0.5       |
| 12    | TRINITY_DN34394_c2_g5_i1 | Plakophilin-1-like                                                                | PKP1    | 0.0     | -3.4    | -4.6    | 1.0       | 0.0       | 0.1       |
| 13    | TRINITY_DN24813_c0_g1_i2 | Similar to Gekko japonicus uncharacterized LOC107121858                           | N/A     | 0.2     | -5.0    | -3.6    | 0.9       | 0.0       | 0.2       |
| 14    | TRINITY_DN30559_c0_g1_i5 | Serine/arginine-rich splicing                                                     | SRSF2   | 0.6     | 3.4     | 3.2     | 0.7       | 0.0       | 0.3       |

|    |                          |                                                                           |          |      |      |      |     |     |     |
|----|--------------------------|---------------------------------------------------------------------------|----------|------|------|------|-----|-----|-----|
|    |                          | factor 2 (SRSF2)                                                          |          |      |      |      |     |     |     |
| 15 | TRINITY_DN34182_c1_g1_i1 | Myosin-4-like                                                             | MYH4     | 0.9  | -1.3 | -8.5 | 0.5 | 0.4 | 0.0 |
| 16 | TRINITY_DN27889_c0_g3_i1 | Peroxisome proliferator-activated receptor alpha (PPARA)                  | PPARA    | 0.9  | -4.4 | -4.0 | 0.5 | 0.0 | 0.2 |
| 17 | TRINITY_DN26747_c2_g1_i4 | Similar to Gekko japonicus uncharacterized LOC107111273                   | N/A      | 0.9  | -5.9 | -1.9 | 0.5 | 0.0 | 0.5 |
| 18 | TRINITY_DN19823_c3_g3_i1 | Similar to Gekko japonicus uncharacterized LOC107117390                   | N/A      | 1.0  | -5.5 | -5.1 | 0.5 | 0.0 | 0.1 |
| 19 | TRINITY_DN30281_c0_g4_i1 | Prosaposin-like                                                           | PSAP     | 1.1  | -5.1 | -6.7 | 0.4 | 0.0 | 0.1 |
| 20 | TRINITY_DN20187_c0_g2_i1 | Serine peptidase inhibitor, Kunitz type 1 (SPINT1)                        | SPINT1   | 1.2  | -3.3 | -3.9 | 0.4 | 0.0 | 0.2 |
| 21 | TRINITY_DN27754_c0_g2_i2 | Cytosolic arginine sensor for mTORC1 subunit 1                            | mTORC1   | 3.9  | 2.3  | -0.6 | 0.0 | 0.3 | 1.0 |
| 22 | TRINITY_DN26638_c0_g3_i1 | Angiopoietin like 7 (angptl7)                                             | angptl7  | 4.0  | 3.0  | -0.6 | 0.0 | 0.1 | 1.0 |
| 23 | TRINITY_DN36464_c1_g1_i2 | Chromosome unknown open reading frame, human C8orf22 like                 | C8orf22l | 4.8  | 3.9  | -0.6 | 0.0 | 0.0 | 1.0 |
| 24 | TRINITY_DN23291_c3_g5_i1 | Uncharacterized                                                           | N/A      | 7.8  | 8.3  | 4.3  | 0.0 | 0.0 | 0.2 |
| 25 | TRINITY_DN38002_c1_g2_i2 | Calsequestrin-1                                                           | CASQ1    | -7.1 | -1.6 | -8.6 | 0.0 | 0.3 | 0.0 |
| 26 | TRINITY_DN22817_c0_g2_i5 | myosin-1B-like isoform X4                                                 | MYO1B    | -6.5 | -3.0 | -5.7 | 0.0 | 0.1 | 0.1 |
| 27 | TRINITY_DN32422_c0_g2_i3 | myosin-1B-like isoform X8                                                 | MYO1B    | -5.9 | -2.3 | -3.0 | 0.0 | 0.1 | 0.3 |
| 28 | TRINITY_DN30722_c0_g2_i4 | muscle-related coiled-coil protein                                        | MURC     | -3.9 | -1.9 | -2.9 | 0.0 | 0.2 | 0.3 |
| 29 | TRINITY_DN34854_c2_g1_i3 | UAP56-interacting factor-like                                             | FYTTD1   | -3.9 | -1.1 | -1.7 | 0.0 | 0.5 | 0.5 |
| 30 | TRINITY_DN30393_c0_g2_i1 | keratin, type II cytoskeletal 4-like                                      | KRT4     | -3.5 | -4.3 | -4.1 | 0.0 | 0.0 | 0.2 |
| 31 | TRINITY_DN38213_c1_g1_i5 | MEF2-activating motif and SAP domain-containing transcriptional regulator | MEF2     | -2.7 | -3.7 | -4.3 | 0.1 | 0.0 | 0.2 |
| 32 | TRINITY_DN22052_c0_g2_i6 | osteocalcin                                                               | BGLAP    | -2.7 | -4.0 | -4.0 | 0.1 | 0.0 | 0.0 |
| 33 | TRINITY_DN36268_c0_g1_i2 | myomegalin isoform X2                                                     | pde4dip  | -2.2 | -3.8 | -4.4 | 0.1 | 0.0 | 0.2 |
| 34 | TRINITY_DN38093_c1_g1_i3 | disintegrin and metalloproteinase                                         | ADAM9    | -2.2 | -3.6 | -1.5 | 0.1 | 0.0 | 0.6 |

|    |                          |                                                             |          |      |      |      |     |     |     |
|----|--------------------------|-------------------------------------------------------------|----------|------|------|------|-----|-----|-----|
|    |                          | domain-containing protein 9                                 |          |      |      |      |     |     |     |
| 35 | TRINITY_DN36578_c0_g1_i4 | ryanodine receptor 2                                        | RYR2     | -2.2 | -4.2 | -4.8 | 0.1 | 0.0 | 0.1 |
| 36 | TRINITY_DN26958_c0_g3_i1 | homeobox protein DLX-3                                      | DLX3     | -2.1 | -3.4 | -3.4 | 0.1 | 0.0 | 0.1 |
| 37 | TRINITY_DN37846_c0_g1_i3 | desmoplakin isoform X1                                      | DSP      | -3.7 | -4.0 | -4.6 | 0.0 | 0.0 | 0.2 |
| 38 | TRINITY_DN22305_c3_g3_i2 | NEDD8                                                       | NEDD8    | -1.6 | 3.5  | 3.6  | 0.6 | 0.0 | 0.2 |
| 39 | TRINITY_DN38176_c1_g2_i2 | uricase-like                                                | UOX      | -1.5 | -5.1 | -5.1 | 0.3 | 0.0 | 0.0 |
| 40 | TRINITY_DN22220_c0_g1_i1 | afadin isoform X6                                           | AFDN     | -1.4 | -3.7 | -4.3 | 0.3 | 0.0 | 0.2 |
| 41 | TRINITY_DN38238_c1_g1_i1 | nebulin isoform X12                                         | NEB      | -1.3 | -6.2 | -4.3 | 0.3 | 0.0 | 0.0 |
| 42 | TRINITY_DN28089_c0_g3_i1 | vesicle-associated membrane protein-associated protein B/C  | VAPB     | -1.2 | -3.8 | -4.4 | 0.4 | 0.0 | 0.2 |
| 43 | TRINITY_DN25660_c0_g5_i1 | 17-beta-hydroxysteroid dehydrogenase 14-like                | HSD17B14 | -3.2 | -5.8 | -7.4 | 0.0 | 0.0 | 0.0 |
| 44 | TRINITY_DN36527_c0_g2_i1 | death-associated protein-like 1                             | DAPL1    | -0.8 | -3.8 | -0.8 | 0.6 | 0.0 | 0.1 |
| 45 | TRINITY_DN31814_c0_g2_i2 | leukocyte elastase inhibitor-like                           | SERPINB1 | -0.7 | -6.2 | -0.7 | 0.6 | 0.0 | 0.0 |
| 46 | TRINITY_DN21431_c0_g2_i3 | poly(rC)-binding protein 2 isoform X11                      | PCBP2    | -0.3 | 3.8  | 3.9  | 1.0 | 0.0 | 0.2 |
| 47 | TRINITY_DN26467_c0_g1_i1 | NHP2-like protein 1                                         | SNU13    | 0.0  | 4.0  | 3.8  | 1.0 | 0.0 | 0.2 |
| 48 | TRINITY_DN37657_c1_g4_i2 | p53 apoptosis effector related to PMP-22                    | PMP-22   | 0.0  | -3.9 | -4.5 | 1.0 | 0.0 | 0.2 |
| 49 | TRINITY_DN35820_c0_g1_i2 | desmin                                                      | DES      | 0.4  | -2.5 | -7.3 | 0.8 | 0.1 | 0.0 |
| 50 | TRINITY_DN26831_c0_g2_i3 | shematin-like protein 2                                     | SHEM1    | 0.6  | -6.8 | -7.8 | 0.7 | 0.0 | 0.0 |
| 51 | TRINITY_DN34867_c2_g1_i3 | methyltransferase-like protein 7A                           | METTL7A  | 1.3  | -3.8 | -4.4 | 0.3 | 0.0 | 0.2 |
| 52 | TRINITY_DN32563_c0_g2_i2 | DDB1- and CUL4-associated factor 6 isoform X1               | DCAF6    | 1.5  | 3.5  | 3.2  | 0.3 | 0.0 | 0.3 |
| 53 | TRINITY_DN19443_c0_g2_i1 | C-C motif chemokine 5-like                                  | CCL5     | 1.9  | 3.7  | 2.2  | 0.2 | 0.0 | 0.5 |
| 54 | TRINITY_DN27678_c0_g3_i1 | retinol-binding protein 5                                   | RBP5     | 2.2  | 3.4  | 1.9  | 0.1 | 0.0 | 0.5 |
| 55 | TRINITY_DN36609_c1_g2_i3 | mitogen-activated protein kinase kinase kinase 7 isoform X2 | MAP3K7   | 3.1  | 2.7  | 2.2  | 0.0 | 0.1 | 0.5 |
| 56 | TRINITY_DN35430_c0_g1_i4 | proteasomal ubiquitin receptor ADRM1                        | ADRM1    | 3.5  | 3.6  | 3.6  | 0.0 | 0.1 | 0.8 |

|    |                           |                                                     |         |      |      |      |     |     |     |
|----|---------------------------|-----------------------------------------------------|---------|------|------|------|-----|-----|-----|
| 57 | TRINITY_DN23823_c0_g2_i4  | AN1-type zinc finger protein 2A                     | ZFAND2A | 3.6  | 3.0  | 3.0  | 0.0 | 0.1 | 0.8 |
| 58 | TRINITY_DN23648_c1_g2_i1  | cathelicidin-related peptide Oh-Cath-like           | CATH    | 3.7  | 4.8  | -0.6 | 0.0 | 0.0 | 1.0 |
| 59 | TRINITY_DN24620_c0_g5_i1  | phospholipase A2 inhibitor subunit gamma B-like     | PLA2    | 3.9  | 4.4  | 1.3  | 0.0 | 0.0 | 0.7 |
| 60 | TRINITY_DN36845_c0_g1_i4  | alpha-actinin-3                                     | ACTN3   | 4.9  | 5.1  | 2.4  | 0.0 | 0.0 | 0.4 |
| 61 | TRINITY_DN31052_c0_g1_i2  | retinoic acid receptor responder protein 1          | RARRES1 | 5.0  | 2.9  | 1.0  | 0.0 | 0.1 | 0.8 |
| 62 | TRINITY_DN23991_c0_g2_i1  | PCNA-associated factor                              | PCLAF   | 3.9  | 3.9  | 5.2  | 1.0 | 0.0 | 0.1 |
| 63 | TRINITY_DN27770_c0_g4_i1  | 14-3-3 protein sigma                                | SFN     | -1.6 | -5.7 | -5.3 | 0.2 | 0.0 | 0.1 |
| 64 | TRINITY_DN20642_c2_g2_i3  | 39S ribosomal protein L17, mitochondrial            | MRPL17  | -3.9 | 1.3  | 2.3  | 0.0 | 0.4 | 0.4 |
| 65 | TRINITY_DN24484_c0_g4_i1  | 40S ribosomal protein S11                           | RPS11   | -3.5 | 1.0  | 1.7  | 0.0 | 0.5 | 0.5 |
| 66 | TRINITY_DN26256_c1_g1_i6  | 40S ribosomal protein S12                           | RPS12   | -0.2 | 0.9  | -8.3 | 0.9 | 0.5 | 0.0 |
| 67 | TRINITY_DN20830_c0_g5_i1  | 40S ribosomal protein S24 isoform X2                | RPS24   | 0.1  | 0.8  | -8.6 | 1.0 | 0.6 | 0.0 |
| 68 | TRINITY_DN23044_c0_g1_i1  | 40S ribosomal protein S25                           | RPS25   | -3.0 | 0.9  | 1.8  | 0.0 | 0.5 | 0.5 |
| 69 | TRINITY_DN24077_c0_g2_i3  | 60S ribosomal protein L18                           | RPL18   | -3.7 | 1.3  | 1.8  | 0.0 | 0.4 | 0.5 |
| 70 | TRINITY_DN20257_c0_g1_i4  | 60S ribosomal protein L35a                          | RPL35A  | 0.2  | 1.6  | -7.4 | 0.9 | 0.3 | 0.0 |
| 71 | TRINITY_DN35974_c0_g2_i1  | A.superbus venom factor 1-like                      | AVF1    | 0.0  | 3.6  | 3.6  | 1.0 | 0.0 | 0.2 |
| 72 | TRINITY_DN31002_c0_g2_i2  | actin, alpha cardiac muscle 1                       | ACTC1   | 0.8  | -0.9 | -8.0 | 0.6 | 0.5 | 0.0 |
| 73 | TRINITY_DN35992_c0_g2_i1  | adenylosuccinate synthetase isozyme 1               | ADSSL1  | -1.5 | -3.4 | -3.0 | 0.3 | 0.0 | 0.3 |
| 74 | TRINITY_DN37906_c2_g1_i5  | alpha-enolase isoform X1                            | ENO1    | -3.9 | 0.1  | -0.6 | 0.0 | 1.0 | 0.8 |
| 75 | TRINITY_DN34147_c2_g1_i3  | alpha-sarcoglycan isoform X2                        | SGCA    | -3.2 | 0.3  | -0.2 | 0.0 | 0.9 | 1.0 |
| 76 | TRINITY_DN34179_c3_g3_i1  | annexin A2                                          | ANXA2   | -0.5 | 0.3  | -8.5 | 0.7 | 0.9 | 0.0 |
| 77 | TRINITY_DN25783_c2_g1_i5  | aspartyl/asparaginyl beta-hydroxylase isoform X3    | ASPH    | -3.8 | 1.4  | 0.1  | 0.0 | 0.4 | 1.0 |
| 78 | TRINITY_DN30115_c0_g2_i10 | ATP synthase F(0) complex subunit C1, mitochondrial | ATP5MC1 | -4.3 | 0.8  | 1.5  | 0.0 | 0.6 | 0.6 |



|    |                          |                                                        |         |       |      |      |     |     |     |
|----|--------------------------|--------------------------------------------------------|---------|-------|------|------|-----|-----|-----|
| 79 | TRINITY_DN26389_c0_g5_i1 | ATP synthase F(0) complex subunit C2, mitochondrial    | ATP5MC2 | -3.6  | 1.1  | 1.0  | 0.0 | 0.5 | 0.7 |
| 80 | TRINITY_DN22271_c0_g2_i2 | ATP synthase subunit d, mitochondrial                  | ATP5PD  | -4.1  | 0.9  | 2.3  | 0.0 | 0.5 | 0.4 |
| 81 | TRINITY_DN21311_c1_g1_i1 | avidin-like                                            | AVD     | 3.1   | 2.5  | 4.7  | 0.0 | 0.1 | 0.1 |
| 82 | TRINITY_DN33064_c0_g1_i3 | bax inhibitor 1                                        | TMBIM6  | -4.5  | 1.0  | 0.8  | 0.0 | 0.5 | 0.8 |
| 83 | TRINITY_DN25564_c1_g2_i5 | bcl-2-like protein 10                                  | BCL2L10 | 3.5   | 2.3  | 0.0  | 0.0 | 0.2 | 1.0 |
| 84 | TRINITY_DN32628_c1_g1_i1 | beta-2-microglobulin isoform X1                        | B2M     | -0.4  | -0.3 | -6.7 | 0.8 | 0.8 | 0.0 |
| 85 | TRINITY_DN37021_c1_g1_i1 | beta-enolase                                           | ENO3    | -0.7  | -1.0 | -8.5 | 0.7 | 0.5 | 0.0 |
| 86 | TRINITY_DN29143_c0_g1_i3 | betaine--homocysteine S-methyltransferase 1            | BHMT    | 3.8   | 2.0  | -2.9 | 0.0 | 0.2 | 0.4 |
| 87 | TRINITY_DN32939_c2_g1_i1 | CCAAT/enhancer-binding protein delta                   | CEBPD   | -3.5  | -1.1 | 1.2  | 0.0 | 0.4 | 0.7 |
| 88 | TRINITY_DN32564_c0_g3_i6 | CD63 antigen                                           | CD63    | -3.6  | 1.2  | 1.7  | 0.0 | 0.4 | 0.5 |
| 89 | TRINITY_DN24309_c1_g1_i2 | claw keratin-like                                      | CKER1   | 3.6   | -7.5 | -4.1 | 0.0 | 0.0 | 0.2 |
| 90 | TRINITY_DN27033_c0_g1_i5 | cold-inducible RNA-binding protein isoform X1          | CIRBP   | -5.4  | -0.2 | -0.2 | 0.0 | 0.9 | 0.9 |
| 91 | TRINITY_DN37825_c1_g3_i1 | collagen alpha-1(I) chain                              | COL1A1  | -1.3  | -4.4 | -7.8 | 0.4 | 0.0 | 0.0 |
| 92 | TRINITY_DN34178_c2_g1_i2 | creatine kinase M-type                                 | CKM     | -6.0  | -0.3 | -0.8 | 0.0 | 0.8 | 0.7 |
| 93 | TRINITY_DN37492_c0_g1_i3 | C-type lectin domain family 2 member D-like isoform X1 | CLEC2D  | -4.5  | -0.6 | -0.2 | 0.0 | 0.7 | 1.0 |
| 94 | TRINITY_DN19561_c3_g3_i1 | cytochrome c oxidase assembly factor 5                 | COA5    | -3.7  | 0.9  | 1.8  | 0.0 | 0.5 | 0.5 |
| 95 | TRINITY_DN30220_c3_g2_i1 | cytochrome c oxidase subunit I (mitochondrion)         | MT-CO1  | -10.7 | 1.0  | 0.9  | 0.0 | 0.4 | 0.7 |
| 96 | TRINITY_DN25546_c6_g2_i1 | cytochrome c oxidase subunit II (mitochondrion)        | MT-CO2  | -9.2  | 1.9  | 2.2  | 0.0 | 0.2 | 0.4 |
| 97 | TRINITY_DN31796_c0_g2_i4 | cytosolic phospholipase A2 gamma                       | PLA2G4C | -1.2  | -3.8 | -4.4 | 0.4 | 0.0 | 0.2 |
| 98 | TRINITY_DN34475_c0_g4_i2 | dehydrogenase/reductase SDR family member 7C           | DHRS7C  | -3.8  | -0.8 | -2.1 | 0.0 | 0.6 | 0.4 |



|     |                          |                                                                      |        |      |      |      |     |     |     |
|-----|--------------------------|----------------------------------------------------------------------|--------|------|------|------|-----|-----|-----|
| 99  | TRINITY_DN27718_c1_g2_i1 | desmin like                                                          | DES    | -3.9 | -0.7 | -1.6 | 0.0 | 0.6 | 0.6 |
| 100 | TRINITY_DN37400_c1_g1_i7 | desmocollin-1 isoform X1                                             | DSC1   | -0.2 | -4.1 | -4.7 | 0.9 | 0.0 | 0.1 |
| 101 | TRINITY_DN38178_c1_g2_i3 | DNA-binding death effector domain-containing protein 2               | DEDD2  | -3.6 | -0.8 | 0.0  | 0.0 | 0.6 | 1.0 |
| 102 | TRINITY_DN25885_c3_g1_i1 | E3 ubiquitin-protein ligase TRIM63                                   | TRIM63 | 3.0  | 4.8  | -2.0 | 0.0 | 0.0 | 0.5 |
| 103 | TRINITY_DN28739_c2_g1_i1 | elongation factor 1-beta                                             | EEF1B2 | -4.5 | 2.2  | 2.2  | 0.0 | 0.1 | 0.4 |
| 104 | TRINITY_DN36346_c1_g1_i2 | endoplasmic reticulum junction formation protein lunapark isoform X1 | Lnpk   | -3.7 | -0.4 | -0.7 | 0.0 | 0.8 | 0.8 |
| 105 | TRINITY_DN29939_c0_g1_i1 | epididymal secretory protein E1                                      | NPC2   | 2.9  | 1.4  | -2.2 | 0.0 | 0.4 | 0.6 |
| 106 | TRINITY_DN20765_c0_g1_i1 | ETS-related transcription factor Elf-3                               | ELF3   | 1.6  | 5.0  | 1.0  | 0.6 | 0.0 | 1.0 |
| 107 | TRINITY_DN37821_c1_g1_i2 | eukaryotic initiation factor 4A-II                                   | EIF4A2 | -2.8 | -0.1 | -0.2 | 0.0 | 1.0 | 0.9 |
| 108 | TRINITY_DN33119_c0_g1_i3 | fatty acid desaturase 1-like                                         | FADS1  | 1.6  | 5.1  | -0.6 | 0.6 | 0.0 | 1.0 |
| 109 | TRINITY_DN33871_c5_g3_i3 | feather keratin B-4-like                                             | FKER4  | 0.1  | -4.3 | -9.3 | 1.0 | 0.0 | 0.0 |
| 110 | TRINITY_DN27663_c1_g2_i5 | ferritin, higher subunit-like                                        | FTL    | -7.0 | 0.3  | 1.6  | 0.0 | 0.8 | 0.6 |
| 111 | TRINITY_DN22711_c0_g2_i1 | fish-egg lectin-like                                                 | FEL    | -3.5 | 0.6  | 0.5  | 0.0 | 0.7 | 0.9 |
| 112 | TRINITY_DN32810_c4_g1_i6 | fructose-bisphosphate aldolase A                                     | ALDA   | -3.7 | -1.7 | 2.9  | 0.0 | 0.2 | 0.3 |
| 113 | TRINITY_DN28408_c0_g2_i2 | glutamine synthetase                                                 | GLUL   | 3.0  | 1.2  | -4.8 | 0.0 | 0.4 | 0.1 |
| 114 | TRINITY_DN37527_c4_g3_i4 | glyceraldehyde-3-phosphate dehydrogenase                             | GAPDH  | -5.2 | 0.8  | 0.4  | 0.0 | 0.3 | 0.9 |
| 115 | TRINITY_DN33097_c1_g3_i1 | glycerol-3-phosphate dehydrogenase [NAD(+)], cytoplasmic             | GAPD1  | -3.3 | 0.3  | -0.1 | 0.0 | 0.8 | 1.0 |
| 116 | TRINITY_DN27794_c1_g1_i3 | glycine-rich cell wall structural protein-like                       | GRP1   | 0.9  | -4.6 | -6.2 | 0.5 | 0.0 | 0.1 |
| 117 | TRINITY_DN37554_c1_g1_i3 | glycogen phosphorylase, liver form                                   | PYGL   | 0.4  | -2.6 | -7.5 | 0.8 | 0.1 | 0.0 |
| 118 | TRINITY_DN37554_c1_g1_i2 | glycogen phosphorylase, muscle                                       | PYGM   | -4.3 | -3.7 | -4.9 | 0.0 | 0.0 | 0.1 |

|     |                          |                                                      |          |      |      |      |     |     |     |
|-----|--------------------------|------------------------------------------------------|----------|------|------|------|-----|-----|-----|
|     |                          | form                                                 |          |      |      |      |     |     |     |
| 119 | TRINITY_DN30693_c1_g1_i3 | GTPase HRas-like                                     | HRAS     | -3.6 | 0.2  | 0.5  | 0.0 | 0.9 | 0.9 |
| 120 | TRINITY_DN28822_c3_g3_i1 | heat shock cognate 71 kDa protein-like               | HSPA8    | -3.8 | 0.4  | 0.4  | 0.0 | 0.8 | 0.9 |
| 121 | TRINITY_DN38168_c1_g1_i1 | heat shock protein 30C-like                          | HSP30C   | 2.9  | -0.8 | -4.8 | 0.0 | 0.6 | 0.1 |
| 122 | TRINITY_DN33508_c0_g1_i3 | heterogeneous nuclear ribonucleoprotein H isoform X4 | HNRNPH1  | 2.7  | 4.0  | 3.4  | 0.1 | 0.0 | 0.2 |
| 123 | TRINITY_DN19565_c0_g2_i1 | HIG1 domain family member 2A, mitochondrial          | HIG2A    | -3.3 | 1.2  | 1.8  | 0.0 | 0.4 | 0.5 |
| 124 | TRINITY_DN23441_c0_g3_i6 | histidine triad nucleotide-binding protein 1         | HINT1    | -3.7 | 0.8  | 1.5  | 0.0 | 0.6 | 0.6 |
| 125 | TRINITY_DN35958_c1_g1_i7 | inosine-5'-monophosphate dehydrogenase 1             | IMPDH1   | -3.5 | -0.5 | -1.0 | 0.0 | 0.8 | 0.7 |
| 126 | TRINITY_DN35280_c0_g1_i2 | keratin, type I cytoskeletal 10-like                 | KRT10    | 0.4  | -4.1 | -4.7 | 0.8 | 0.0 | 0.1 |
| 127 | TRINITY_DN37110_c0_g1_i3 | keratin, type I cytoskeletal 14-like                 | KRT14    | 2.3  | 4.8  | -1.2 | 0.1 | 0.0 | 0.8 |
| 128 | TRINITY_DN20271_c0_g1_i2 | keratin, type I cytoskeletal 19                      | KRT19    | -2.7 | -5.2 | -7.2 | 0.1 | 0.0 | 0.0 |
| 129 | TRINITY_DN34028_c0_g1_i5 | keratin, type I cytoskeletal 23-like                 | KRT23    | 0.2  | -3.7 | -5.6 | 0.9 | 0.0 | 0.1 |
| 130 | TRINITY_DN20247_c0_g2_i3 | keratin, type I cytoskeletal 24-like                 | KRT24    | -0.1 | -4.8 | -7.4 | 1.0 | 0.0 | 0.0 |
| 131 | TRINITY_DN37419_c0_g2_i1 | keratin, type II cytoskeletal 5-like                 | KRT5     | -3.0 | -3.4 | -7.0 | 0.0 | 0.0 | 0.0 |
| 132 | TRINITY_DN37980_c1_g3_i3 | keratin, type II cytoskeletal cochlear-like          | KRT7     | -0.3 | -5.7 | -9.0 | 0.8 | 0.0 | 0.0 |
| 133 | TRINITY_DN33770_c1_g2_i1 | keratin-associated protein 5-5-like                  | KRTAP5-5 | 0.4  | -3.9 | -0.5 | 0.8 | 0.0 | 0.9 |
| 134 | TRINITY_DN21461_c0_g2_i2 | keratin-associated protein 9-1-like                  | KRTAP9-1 | 0.7  | -4.3 | -2.7 | 0.6 | 0.0 | 0.3 |
| 135 | TRINITY_DN24317_c2_g1_i3 | luc7-like protein 3 isoform X1                       | LUC7L3   | -4.0 | 1.0  | 1.3  | 0.0 | 0.5 | 0.6 |
| 136 | TRINITY_DN30544_c0_g1_i3 | ly6/PLAUR domain-containing protein 3-like           | LYPD3    | 0.2  | -5.6 | -2.3 | 0.9 | 0.0 | 0.4 |
| 137 | TRINITY_DN30209_c0_g2_i1 | lymphocyte antigen 6E-like                           | Ly6a     | 0.4  | -3.7 | -2.7 | 0.8 | 0.0 | 0.3 |
| 138 | TRINITY_DN29603_c0_g1_i4 | MAPK regulated corepressor interacting protein 2     | MCRIP2   | 2.9  | 2.1  | -1.6 | 0.0 | 0.2 | 0.7 |
| 139 | TRINITY_DN26604_c2_g2_i6 | microtubule-associated proteins                      | MAP1LC3B | 3.7  | 1.0  | -0.6 | 0.0 | 1.0 | 1.0 |

|     |                          |                                                                     |        |      |      |      |     |     |     |
|-----|--------------------------|---------------------------------------------------------------------|--------|------|------|------|-----|-----|-----|
|     |                          | 1A/1B light chain 3B                                                |        |      |      |      |     |     |     |
| 140 | TRINITY_DN35142_c1_g2_i2 | mitochondrial uncoupling protein 3                                  | UCP3   | 1.2  | 4.0  | -2.6 | 0.5 | 0.0 | 0.5 |
| 141 | TRINITY_DN34043_c1_g1_i3 | myc box-dependent-interacting protein 1 isoform X6                  | BIN1   | -2.9 | -0.6 | -1.1 | 0.0 | 0.7 | 0.7 |
| 142 | TRINITY_DN37316_c3_g1_i4 | myc box-dependent-interacting protein 1 isoform X8                  | BIN1   | -5.0 | 1.0  | 0.9  | 0.0 | 0.5 | 0.7 |
| 143 | TRINITY_DN31785_c1_g2_i6 | myelin P2 protein-like                                              | PMP2   | 2.3  | -4.2 | -4.8 | 0.1 | 0.0 | 0.1 |
| 144 | TRINITY_DN30564_c1_g1_i4 | myoblast determination protein 1                                    | MYOD1  | -3.3 | 0.5  | 1.0  | 0.0 | 0.7 | 0.7 |
| 145 | TRINITY_DN38080_c1_g1_i2 | myomesin-1 isoform X1                                               | MYOM1  | -2.1 | -3.7 | -4.3 | 0.2 | 0.0 | 0.2 |
| 146 | TRINITY_DN34011_c0_g1_i1 | myosin heavy chain, skeletal muscle, adult                          | MYH1   | -1.0 | -4.6 | -7.0 | 0.5 | 0.0 | 0.0 |
| 147 | TRINITY_DN34714_c1_g1_i2 | myosin light chain 1/3, skeletal muscle isoform isoform X2          | MYL1   | -5.3 | 0.8  | 0.1  | 0.0 | 0.5 | 1.0 |
| 148 | TRINITY_DN23319_c0_g1_i6 | myosin light polypeptide 6 isoform X2                               | MYL6   | -3.2 | 0.7  | 1.2  | 0.0 | 0.7 | 0.6 |
| 149 | TRINITY_DN23306_c0_g2_i1 | myosin regulatory light chain 2, ventricular/cardiac muscle isoform | MYL2   | -0.5 | -4.4 | 1.1  | 0.7 | 0.0 | 0.7 |
| 150 | TRINITY_DN38338_c2_g2_i3 | myosin-1B-like isoform X2                                           | MYO1B  | -0.9 | -3.8 | -6.2 | 0.5 | 0.0 | 0.1 |
| 151 | TRINITY_DN38343_c2_g1_i2 | myosin-1B-like isoform X4                                           | MYO1B  | 0.2  | -0.8 | -6.7 | 0.9 | 0.6 | 0.0 |
| 152 | TRINITY_DN38338_c1_g1_i3 | myosin-1B-like isoform X4 like                                      | MYO1B  | -3.1 | -3.3 | -2.5 | 0.0 | 0.0 | 0.4 |
| 153 | TRINITY_DN26737_c2_g1_i1 | myosin-3-like isoform X7                                            | MYH3   | -5.5 | 1.2  | 0.5  | 0.0 | 0.3 | 0.9 |
| 154 | TRINITY_DN30527_c1_g1_i1 | myosin-7B isoform X2                                                | MYH7B  | -3.0 | 1.1  | 0.1  | 0.0 | 0.5 | 1.0 |
| 155 | TRINITY_DN37664_c0_g1_i2 | myosin-binding protein C, fast-type                                 | MYBPC2 | -3.6 | 0.1  | -0.1 | 0.0 | 1.0 | 1.0 |
| 156 | TRINITY_DN32432_c1_g1_i3 | myozenin-1 isoform X1                                               | MYOZ1  | -3.6 | 0.3  | 0.0  | 0.0 | 0.9 | 1.0 |
| 157 | TRINITY_DN21082_c0_g1_i3 | NADH dehydrogenase [ubiquinone] 1 subunit C2                        | NDUFC2 | -5.1 | 1.2  | 1.8  | 0.0 | 0.4 | 0.5 |
| 158 | TRINITY_DN21927_c2_g5_i1 | NADH dehydrogenase subunit 5 (mitochondrion)                        | NDUFV2 | 5.2  | 4.7  | 1.7  | 0.0 | 0.0 | 0.6 |

|     |                          |                                                                                             |          |      |      |      |            |            |     |
|-----|--------------------------|---------------------------------------------------------------------------------------------|----------|------|------|------|------------|------------|-----|
| 159 | TRINITY_DN38263_c1_g1_i3 | nebulin isoform X34                                                                         | NEB      | -0.9 | -3.7 | -4.8 | 0.5        | <b>0.0</b> | 0.1 |
| 160 | TRINITY_DN16072_c1_g1_i3 | Similar to Apteryx australis mantelli genome assembly AptMant0                              | N/A      | -4.0 | -1.1 | -1.3 | <b>0.0</b> | 0.5        | 0.6 |
| 161 | TRINITY_DN18856_c0_g1_i1 | Scavenger receptor class B member 2 S homeolog (scarb2.S), mRNA                             | SCARB2   | 2.0  | 4.0  | 1.0  | 0.4        | <b>0.0</b> | 1.0 |
| 162 | TRINITY_DN18900_c1_g6_i1 | Keratin-associated protein 4-8-like (LOC107109571), mRNA                                    | KRTAP4-8 | 4.2  | 2.0  | 1.0  | <b>0.0</b> | 0.4        | 1.0 |
| 163 | TRINITY_DN20555_c2_g2_i3 | Zinc finger protein 239-like (LOC107181380), mRNA                                           | ZFP239   | 2.8  | 3.3  | 3.7  | 0.1        | <b>0.0</b> | 0.2 |
| 164 | TRINITY_DN20594_c5_g1_i3 | Similar to Scarelus anthracinus voucher UPOL NG0053 NADH dehydrogenase subunit 5 (ND5) gene | ND5      | -4.1 | 0.4  | 1.2  | <b>0.0</b> | 0.8        | 0.7 |
| 165 | TRINITY_DN20871_c1_g2_i1 | Cathepsin Z (CTSZ)                                                                          | CTSZ     | 0.7  | -4.5 | -5.7 | 0.6        | <b>0.0</b> | 0.1 |
| 166 | TRINITY_DN20937_c1_g4_i2 | Solute carrier family 38 member 5 (SLC38A5)                                                 | SLC38A5  | -3.7 | 1.4  | 1.8  | <b>0.0</b> | 0.3        | 0.5 |
| 167 | TRINITY_DN21620_c1_g1_i3 | Monocarboxylate transporter 1-like (LOC107125559), mRNA                                     | SLC16A1  | 3.5  | 2.0  | -0.6 | <b>0.0</b> | 0.4        | 1.0 |
| 168 | TRINITY_DN22245_c1_g1_i2 | Cyclic AMP-dependent transcription factor ATF-2                                             | ATF2     | -0.6 | 3.5  | 2.2  | 1.0        | <b>0.0</b> | 0.5 |
| 169 | TRINITY_DN23291_c3_g7_i1 | Calsequestrin-1 like                                                                        | CASQ1    | -8.4 | 0.3  | 0.1  | <b>0.0</b> | 0.9        | 1.0 |
| 170 | TRINITY_DN23323_c1_g1_i1 | Parvalbumin (PVALB), mRNA                                                                   | PVALB    | 3.0  | 1.6  | -3.8 | <b>0.0</b> | 0.3        | 0.3 |
| 171 | TRINITY_DN23920_c1_g2_i2 | WD repeat and SOCS box containing 1 (WSB1),                                                 | WB1      | -5.2 | 1.1  | 1.4  | <b>0.0</b> | 0.4        | 0.6 |
| 172 | TRINITY_DN24078_c2_g1_i1 | Ring finger protein 24 (RNF24), transcript variant X1, mRNA                                 | RNF24    | 1.4  | -4.3 | -4.9 | 0.3        | <b>0.0</b> | 0.1 |
| 173 | TRINITY_DN24197_c1_g1_i1 | KIS(5-71) SINE Squam1, complete sequence                                                    | Squam1   | 3.9  | -1.0 | 0.7  | <b>0.0</b> | 1.0        | 0.9 |
| 174 | TRINITY_DN24202_c0_g4_i2 | Similar to Gekko japonicus                                                                  | SLN      | -8.5 | 1.0  | -0.6 | <b>0.0</b> | 0.5        | 0.8 |

|     |                          |                                                                                                        |         |      |      |      |     |     |     |
|-----|--------------------------|--------------------------------------------------------------------------------------------------------|---------|------|------|------|-----|-----|-----|
|     |                          | sarcopin (SLN), transcript variant X1                                                                  |         |      |      |      |     |     |     |
| 175 | TRINITY_DN24910_c2_g3_i9 | Plasmolipin (PLLP), mRNA                                                                               | PLLP    | 2.9  | 0.4  | -2.2 | 0.0 | 1.0 | 0.6 |
| 176 | TRINITY_DN26094_c0_g2_i6 | Similar to Cyprinus carpio genome assembly common carp genome                                          | N/A     | 0.7  | -5.8 | -2.1 | 0.6 | 0.0 | 0.4 |
| 177 | TRINITY_DN26203_c0_g1_i1 | Similar to Drosophila ficusphila sodium/potassium/calcium exchanger Nckx30C                            | Nckx30C | -4.2 | 1.0  | 0.4  | 0.0 | 0.5 | 0.9 |
| 178 | TRINITY_DN26440_c3_g2_i2 | Erythrocyte membrane protein band 4.1 (EPB41), transcript variant X13, mRNA                            | EPB41   | 6.0  | 3.7  | -0.6 | 0.0 | 0.0 | 1.0 |
| 179 | TRINITY_DN26576_c1_g1_i1 | DOT1 like histone lysine methyltransferase (DOT1L)                                                     | DOT1L   | -3.8 | 1.1  | 1.6  | 0.0 | 0.4 | 0.6 |
| 180 | TRINITY_DN27369_c1_g4_i1 | Ring finger protein 20 (RNF20), mRNA                                                                   | RNF20   | -4.2 | 1.5  | 2.5  | 0.0 | 0.3 | 0.4 |
| 181 | TRINITY_DN27386_c1_g1_i4 | ATPase inhibitory factor 1 (ATPIF1)                                                                    | ATPIF1  | -5.2 | 0.9  | 1.8  | 0.0 | 0.5 | 0.5 |
| 182 | TRINITY_DN27804_c1_g2_i1 | Glutamate receptor interacting protein 2                                                               | GRIP2   | 0.0  | 4.2  | 0.0  | 1.0 | 0.0 | 1.0 |
| 183 | TRINITY_DN27804_c1_g2_i5 | Solute carrier family 6 (neurotransmitter transporter), member 6 (SLC6A6), transcript variant X3, mRNA | SLC6A6  | 3.3  | 0.7  | -2.2 | 0.0 | 0.8 | 0.6 |
| 184 | TRINITY_DN27900_c1_g1_i3 | Premature ovarian failure, 1B (POF1B)                                                                  | POF1B   | -4.6 | 1.4  | 2.1  | 0.0 | 0.4 | 0.4 |
| 185 | TRINITY_DN27971_c0_g2_i2 | Lymphocyte antigen 86 (LY86), transcript variant X1, mRNA                                              | LY86    | 3.5  | -0.6 | -2.2 | 0.0 | 1.0 | 0.6 |
| 186 | TRINITY_DN28000_c3_g1_i2 | 28S ribosomal RNA                                                                                      | RPS28   | -4.3 | 0.4  | 0.3  | 0.0 | 0.8 | 0.9 |
| 187 | TRINITY_DN28023_c1_g1_i1 | Xin actin-binding repeat-containing protein 2-like                                                     | XIRP2l  | -6.8 | 0.8  | 1.3  | 0.0 | 0.6 | 0.6 |

|     |                          |                                                                                |              |      |      |      |     |     |     |
|-----|--------------------------|--------------------------------------------------------------------------------|--------------|------|------|------|-----|-----|-----|
| 188 | TRINITY_DN28063_c0_g2_i3 | Myozenin 3 (MYOZ3)                                                             | MYOZ3        | -3.7 | -0.1 | -1.7 | 0.0 | 1.0 | 0.5 |
| 189 | TRINITY_DN28124_c0_g5_i6 | Tropomyosin 1 (TPM1), transcript variant X5,                                   | TPM1         | -5.3 | -0.1 | -0.4 | 0.0 | 0.9 | 0.9 |
| 190 | TRINITY_DN29368_c2_g1_i1 | similar to Podarcis muralis uncharacterized LOC114586692 (LOC114586692), ncRNA | LOC114586692 | 1.3  | -5.0 | -7.1 | 0.4 | 0.0 | 0.0 |
| 191 | TRINITY_DN30390_c1_g1_i1 | Myc box-dependent-interacting protein 1                                        | BIN1         | -4.1 | 0.3  | 0.3  | 0.0 | 0.9 | 0.9 |
| 192 | TRINITY_DN30395_c0_g1_i5 | Keratin, type II cytoskeletal 1                                                | KRT1         | -3.5 | -3.2 | -7.1 | 0.0 | 0.0 | 0.0 |
| 193 | TRINITY_DN30509_c0_g1_i2 | Calcium/calmodulin dependent protein kinase II gamma (CAMK2G)                  | CAMK2G       | -3.5 | 0.3  | 0.3  | 0.0 | 0.9 | 0.9 |
| 194 | TRINITY_DN30512_c2_g1_i4 | Fermitin family member 2 (FERMT2), transcript variant X4, mRNA                 | FERMT2       | 3.5  | 2.3  | -0.6 | 0.0 | 0.3 | 1.0 |
| 195 | TRINITY_DN30587_c0_g2_i1 | Uncharacterized                                                                | N/A          | -2.9 | 1.2  | 1.6  | 0.0 | 0.4 | 0.6 |
| 196 | TRINITY_DN30884_c0_g2_i1 | FANCD2/FANCI-associated nuclease 1 (FAN1)                                      | FAN1         | -4.7 | 0.9  | 1.1  | 0.0 | 0.5 | 0.7 |
| 197 | TRINITY_DN31847_c0_g3_i1 | Cold inducible RNA binding protein                                             | CIRBP        | -3.7 | 0.5  | 1.5  | 0.0 | 0.7 | 0.6 |
| 198 | TRINITY_DN32104_c3_g1_i3 | Integrin subunit beta 2 (ITGB2), mRNA                                          | ITGB2        | 3.3  | -3.7 | -4.3 | 0.0 | 0.0 | 0.2 |
| 199 | TRINITY_DN32564_c0_g2_i1 | CD63 molecule (CD63), transcript variant X2, mRNA                              | CD63         | 3.2  | 2.5  | 1.2  | 0.0 | 0.1 | 0.8 |
| 200 | TRINITY_DN32941_c3_g1_i2 | Triosephosphate isomerase 1 (TPI1), mRNA                                       | TPI1         | 1.5  | 1.0  | -6.9 | 0.3 | 0.5 | 0.0 |
| 201 | TRINITY_DN33871_c5_g3_i1 | Similar to Hemidactylus turcicus mRNA for ge-gprp4                             | gpr4         | -0.4 | -3.8 | 2.1  | 0.8 | 0.0 | 0.5 |
| 202 | TRINITY_DN34416_c0_g3_i1 | Centromere-associated protein E (LOC108000233), transcript variant X2          | CENPE        | -4.1 | 0.7  | 1.2  | 0.0 | 0.7 | 0.7 |

|     |                          |                                                                                                          |         |      |      |      |     |     |     |
|-----|--------------------------|----------------------------------------------------------------------------------------------------------|---------|------|------|------|-----|-----|-----|
| 203 | TRINITY_DN34551_c1_g1_i2 | Unconventional myosin-XVI-like                                                                           | MYO16   | -4.8 | 1.9  | 0.1  | 0.0 | 0.2 | 1.0 |
| 204 | TRINITY_DN35421_c1_g1_i4 | Xin actin binding repeat containing 2 (XIRP2)                                                            | XIRP2   | -4.0 | -0.3 | -1.1 | 0.0 | 0.8 | 0.7 |
| 205 | TRINITY_DN36311_c0_g2_i1 | Homocysteine-inducible, endoplasmic reticulum stress-inducible, ubiquitin-like domain member 1 (HERPUD1) | HERPUD1 | -3.5 | -0.1 | 1.3  | 0.0 | 1.0 | 0.6 |
| 206 | TRINITY_DN37045_c0_g1_i3 | Unknown open reading frame, human C8orf22 (LOC107107199), mRNA                                           | C8orf22 | 4.5  | 2.8  | -2.6 | 0.0 | 0.1 | 0.5 |
| 207 | TRINITY_DN37251_c1_g5_i2 | Calpain small subunit 1                                                                                  | CAPNS1  | -3.5 | 0.6  | 1.7  | 0.0 | 0.7 | 0.5 |
| 208 | TRINITY_DN37466_c1_g3_i1 | NDRG1 protein                                                                                            | NDRG1   | -1.0 | 3.8  | 0.4  | 1.0 | 0.0 | 1.0 |
| 209 | TRINITY_DN37517_c6_g2_i2 | Parvalbumin beta-like (LOC107123052), mRNA                                                               | N/A     | 3.4  | 3.4  | 1.8  | 0.1 | 0.0 | 0.5 |
| 210 | TRINITY_DN37631_c0_g1_i1 | Similar to Gopherus evgoodei uncharacterized LOC115654989                                                | N/A     | -5.2 | 0.3  | 0.4  | 0.0 | 0.9 | 0.9 |
| 211 | TRINITY_DN37929_c1_g1_i4 | Methylthioadenosine phosphorylase (MTAP)                                                                 | MTAP    | -7.3 | 0.2  | -1.2 | 0.0 | 0.9 | 0.7 |
| 212 | TRINITY_DN38030_c0_g2_i3 | Autophagy-related protein 9A-like (LOC107118613), transcript variant X6, mRNA                            | ATG9A   | 3.0  | 1.3  | -1.6 | 0.0 | 0.4 | 0.7 |
| 213 | TRINITY_DN38294_c1_g2_i2 | Periostin (POSTN), transcript variant X12                                                                | POSTN   | -3.0 | 1.6  | 0.9  | 0.0 | 0.3 | 0.7 |
| 214 | TRINITY_DN38304_c1_g2_i1 | Collagen type III alpha 1 chain (COL3A1)                                                                 | COL3A1  | -1.6 | -5.4 | -0.1 | 0.2 | 0.0 | 1.0 |
| 215 | TRINITY_DN35262_c0_g1_i1 | ornithine decarboxylase antizyme 2                                                                       | OAZ2    | -4.3 | 0.2  | 0.8  | 0.0 | 0.9 | 0.8 |
| 216 | TRINITY_DN36464_c1_g1_i6 | pancreatic progenitor cell differentiation and proliferation factor-like protein                         | PPDPFL  | 5.0  | 2.2  | -1.6 | 0.0 | 0.2 | 0.8 |
| 217 | TRINITY_DN29832_c0_g2_i2 | PDZ and LIM domain protein 5                                                                             | PDLIM5  | -5.4 | 0.4  | -1.0 | 0.0 | 0.8 | 0.7 |



|     |                          |                                                                                   |           |      |      |      |     |     |     |
|-----|--------------------------|-----------------------------------------------------------------------------------|-----------|------|------|------|-----|-----|-----|
|     |                          | isoform X2                                                                        |           |      |      |      |     |     |     |
| 218 | TRINITY_DN33680_c0_g2_i5 | PDZ and LIM domain protein 7 isoform X4                                           | PDLIM7    | -7.4 | 0.2  | -0.4 | 0.0 | 0.9 | 0.9 |
| 219 | TRINITY_DN27621_c0_g2_i4 | peptidyl-prolyl cis-trans isomerase FKBP3                                         | FKBP3     | -3.6 | 1.5  | 1.3  | 0.0 | 0.3 | 0.6 |
| 220 | TRINITY_DN29857_c1_g1_i1 | phosphoglycerate kinase 1                                                         | PGK1      | -3.3 | 0.3  | -0.2 | 0.0 | 0.8 | 0.9 |
| 221 | TRINITY_DN37070_c1_g3_i1 | plakophilin-1                                                                     | PKP1      | -1.5 | -3.8 | -4.4 | 0.3 | 0.0 | 0.2 |
| 222 | TRINITY_DN28295_c1_g2_i3 | polyubiquitin-B isoform X1                                                        | UBB       | 3.6  | 2.5  | -0.6 | 0.0 | 0.1 | 0.9 |
| 223 | TRINITY_DN30180_c0_g1_i2 | probable ATP-dependent RNA helicase DDX17                                         | DDX17     | -1.2 | -3.8 | -4.4 | 0.4 | 0.0 | 0.2 |
| 224 | TRINITY_DN24163_c0_g2_i1 | probable peroxisomal membrane protein PEX13                                       | PEX13     | 3.6  | 0.0  | 0.4  | 0.0 | 1.0 | 1.0 |
| 225 | TRINITY_DN35520_c1_g2_i4 | proline dehydrogenase 1, mitochondrial-like                                       | PRODH     | 3.4  | 1.8  | -1.6 | 0.0 | 0.2 | 0.6 |
| 226 | TRINITY_DN28789_c0_g1_i4 | protein FAM162A                                                                   | FAM162A   | -3.6 | 0.5  | 1.6  | 0.0 | 0.8 | 0.5 |
| 227 | TRINITY_DN31243_c0_g1_i1 | protein FAM184B                                                                   | FAM184B   | 3.7  | 1.6  | -0.6 | 0.0 | 0.6 | 1.0 |
| 228 | TRINITY_DN36144_c0_g1_i4 | protein kinase C and casein kinase substrate in neurons protein 2-like isoform X1 | PACSIN2   | -3.6 | -1.0 | -1.2 | 0.0 | 0.5 | 0.7 |
| 229 | TRINITY_DN28763_c0_g4_i1 | protein SET                                                                       | SET       | -3.2 | 1.1  | 1.6  | 0.0 | 0.4 | 0.5 |
| 230 | TRINITY_DN37046_c1_g1_i4 | pyruvate kinase PKM isoform X1                                                    | PKM       | -4.0 | -0.8 | -1.5 | 0.0 | 0.6 | 0.6 |
| 231 | TRINITY_DN28890_c1_g2_i9 | regulator of cell cycle RGCC-like                                                 | RGCC      | 2.0  | 3.7  | 2.2  | 0.4 | 0.0 | 0.6 |
| 232 | TRINITY_DN37687_c1_g1_i5 | RNA-binding protein 24                                                            | RBM24     | -3.6 | 0.2  | -0.1 | 0.0 | 0.9 | 1.0 |
| 233 | TRINITY_DN38335_c0_g1_i1 | ryanodine receptor 1                                                              | RYR1      | -3.8 | -3.6 | -5.2 | 0.0 | 0.0 | 0.1 |
| 234 | TRINITY_DN38019_c1_g3_i2 | sarcoplasmic/endoplasmic reticulum calcium ATPase 1                               | ATP2A1    | -4.5 | -0.4 | -1.1 | 0.0 | 0.8 | 0.7 |
| 235 | TRINITY_DN29632_c0_g2_i2 | serpin B10-like                                                                   | SERPINB10 | 0.9  | -6.9 | -2.4 | 0.5 | 0.0 | 0.4 |
| 236 | TRINITY_DN30685_c0_g2_i5 | S-formylglutathione hydrolase                                                     | ESD       | -3.8 | 1.1  | 1.0  | 0.0 | 0.5 | 0.7 |
| 237 | TRINITY_DN35169_c0_g3_i1 | SH3 domain-binding glutamic acid-rich protein                                     | SH3BGR    | -3.5 | 0.0  | -1.7 | 0.0 | 1.0 | 0.5 |



|     |                           |                                                 |         |      |      |      |     |     |     |
|-----|---------------------------|-------------------------------------------------|---------|------|------|------|-----|-----|-----|
| 238 | TRINITY_DN29450_c0_g3_i3  | sphingomyelin phosphodiesterase 5               | smpd5   | 1.0  | 3.9  | 1.0  | 1.0 | 0.0 | 1.0 |
| 239 | TRINITY_DN19422_c0_g1_i2  | thioredoxin domain-containing protein 17        | TXNDC17 | 0.0  | -0.9 | -7.4 | 1.0 | 0.5 | 0.0 |
| 240 | TRINITY_DN38339_c2_g2_i1  | titin isoform X10                               | TTN     | -1.4 | -4.9 | -8.3 | 0.3 | 0.0 | 0.0 |
| 241 | TRINITY_DN25133_c0_g1_i11 | trans-1,2-dihydrobenzene-1,2-diol dehydrogenase | DHDH    | 1.1  | -3.8 | -5.3 | 0.4 | 0.0 | 0.1 |
| 242 | TRINITY_DN37409_c0_g1_i2  | transitional endoplasmic reticulum ATPase       | VCP     | -3.6 | -0.1 | -0.2 | 0.0 | 1.0 | 1.0 |
| 243 | TRINITY_DN37819_c2_g1_i8  | translationally-controlled tumor protein        | TPT1    | -3.2 | 1.1  | 1.3  | 0.0 | 0.5 | 0.6 |
| 244 | TRINITY_DN28724_c0_g2_i2  | transmembrane protein 223                       | TMEM223 | 2.3  | 3.8  | 2.4  | 0.2 | 0.0 | 0.5 |
| 245 | TRINITY_DN37095_c3_g2_i3  | triosephosphate isomerase                       | TPI1    | -3.7 | -0.6 | -0.2 | 0.0 | 0.7 | 0.9 |
| 246 | TRINITY_DN37172_c0_g2_i2  | tripartite motif-containing protein 72          | TRIM72  | 2.8  | 1.1  | -2.9 | 0.0 | 0.5 | 0.4 |
| 247 | TRINITY_DN31007_c0_g2_i5  | tropomodulin-4                                  | TMOD4   | -3.8 | 0.7  | 0.2  | 0.0 | 0.6 | 1.0 |
| 248 | TRINITY_DN32390_c3_g1_i2  | tropomyosin alpha-3 chain isoform X1            | TPM3    | -4.5 | 0.6  | 0.0  | 0.0 | 0.7 | 1.0 |
| 249 | TRINITY_DN38292_c1_g1_i4  | troponin I, fast skeletal muscle                | TNNI2   | -9.3 | 1.4  | 0.3  | 0.0 | 0.3 | 0.9 |
| 250 | TRINITY_DN28063_c1_g1_i2  | troponin I, slow skeletal muscle                | TNNI1   | -3.5 | 1.2  | 0.8  | 0.0 | 0.4 | 0.8 |
| 251 | TRINITY_DN24287_c5_g2_i1  | troponin T, fast skeletal muscle isoform X1     | TNNT3   | -5.9 | 1.0  | 0.0  | 0.0 | 0.4 | 1.0 |
| 252 | TRINITY_DN27210_c1_g2_i1  | ubiquitin-60S ribosomal protein L40             | UBA52   | -4.7 | 1.2  | 1.7  | 0.0 | 0.4 | 0.5 |
| 253 | TRINITY_DN30472_c0_g1_i3  | vitamin D3 hydroxylase-associated protein-like  | VDHAP   | -3.2 | 1.0  | 0.2  | 0.0 | 0.5 | 0.9 |
| 254 | TRINITY_DN38095_c1_g1_i2  | zinc finger protein 106 isoform X1              | ZNF106  | -1.2 | -4.0 | -4.6 | 0.4 | 0.0 | 0.2 |

Table 2: List of differentially expressed protein based on iTRAQ proteomic analysis. Accession, description, symbol, No of peptides identified, peptide sequence matches, 1dpa fold changes, 2dpa fold changes, 5dpa fold changes, 1dpa SEM, 2dpa SEM and 5dpa SEM were shown in each column.

| S.No | Accession                | Description                                                | Symbol | # Peptides | # PSMs | 1DPA | 2DPA  | 5DPA  | SEM1 | SEM2        | SEM5        |
|------|--------------------------|------------------------------------------------------------|--------|------------|--------|------|-------|-------|------|-------------|-------------|
| 1    | TRINITY_DN23220_c0_g2_i4 | hemoglobin subunit beta                                    | HBB    | 3          | 3      | 3.85 | 2.79  | -0.85 | 0.29 | 0.68        | 0.59        |
| 2    | TRINITY_DN34721_c0_g1_i1 | myosin-binding protein H                                   | MYBPH  | 1          | 1      | 3.17 | 0.32  | -1.82 | 0.13 | 0.13        | 0.19        |
| 3    | TRINITY_DN19815_c3_g1_i2 | hemoglobin subunit alpha-D                                 | HBAD   | 2          | 4      | 3.13 | 1.66  | -1.74 | 0.66 | 0.76        | 0.50        |
| 4    | TRINITY_DN31561_c0_g6_i1 | S100-A7-like                                               | S100A7 | 3          | 5      | 2.86 | 0.29  | -0.66 | 0.21 | 2.34        | 4.06        |
| 5    | TRINITY_DN23557_c1_g5_i3 | TRINITY_DN23557_c1_g5_i3                                   | N/A    | 1          | 1      | 2.85 | -1.45 | -3.66 | 0.16 | 0.22        | 0.33        |
| 6    | TRINITY_DN22863_c0_g2_i2 | histone H2A.Z                                              | H2AFZ  | 4          | 8      | 2.68 | 1.34  | -0.39 | 1.08 | 0.73        | 0.15        |
| 7    | TRINITY_DN36348_c1_g1_i1 | Annexin A2                                                 | ANXA2  | 4          | 7      | 2.20 | 1.06  | -0.37 | 0.46 | 0.34        | 0.54        |
| 8    | TRINITY_DN33300_c0_g3_i5 | TRINITY_DN33300_c0_g3_i5                                   | N/A    | 8          | 12     | 2.19 | 1.36  | -0.48 | 0.05 | 0.21        | 0.25        |
| 9    | TRINITY_DN36487_c0_g2_i1 | cathepsin B                                                | CTSB   | 1          | 2      | 2.05 | 0.07  | -1.83 | 0.18 | 0.06        | <b>0.03</b> |
| 10   | TRINITY_DN34850_c1_g2_i1 | mimecan                                                    | OGN    | 4          | 6      | 2.03 | -0.06 | -2.48 | 0.06 | 0.32        | 0.73        |
| 11   | TRINITY_DN29980_c3_g2_i1 | myosin light chain 1/3, skeletal muscle isoform isoform X2 | MYL1   | 6          | 10     | 1.95 | 1.51  | -0.97 | 0.56 | 0.40        | 0.41        |
| 12   | TRINITY_DN23998_c0_g1_i3 | tubulin beta chain                                         | TUBB   | 5          | 6      | 1.80 | 0.89  | -1.08 | 0.20 | 0.24        | <b>0.03</b> |
| 13   | TRINITY_DN23258_c0_g1_i1 | histone H2B 5                                              | H2B-V  | 2          | 4      | 1.79 | -0.06 | -1.59 | 0.74 | 0.81        | 0.82        |
| 14   | TRINITY_DN36141_c1_g1_i2 | L-lactate dehydrogenase A chain                            | LDHA   | 8          | 10     | 1.76 | 1.09  | -2.44 | 0.73 | 0.63        | 2.83        |
| 15   | TRINITY_DN26001_c2_g1_i2 | alpha-actinin-1 isoform X1                                 | ACTN1  | 2          | 2      | 1.70 | 1.13  | -0.68 | 0.37 | 0.45        | 0.29        |
| 16   | TRINITY_DN25724_c1_g3_i3 | vimentin                                                   | VIM    | 6          | 6      | 1.68 | 1.00  | -0.97 | 0.61 | 0.43        | 0.38        |
| 17   | TRINITY_DN38128_c1_g2_i3 | myosin-binding protein C, slow-type isoform X6             | MYBPC1 | 7          | 13     | 1.64 | 0.99  | -0.55 | 2.45 | 0.45        | 0.77        |
| 18   | TRINITY_DN12736_c0_g1_i1 | apolipoprotein A-I                                         | APOA1  | 5          | 10     | 1.64 | -0.63 | -2.25 | 0.20 | 0.50        | 0.73        |
| 19   | TRINITY_DN36902_c2_g1_i2 | alcohol dehydrogenase 1                                    | Adh1   | 1          | 1      | 1.63 | 1.74  | -1.76 | 0.05 | <b>0.02</b> | <b>0.04</b> |

|    |                          |                                                 |           |    |    |      |       |       |             |             |             |
|----|--------------------------|-------------------------------------------------|-----------|----|----|------|-------|-------|-------------|-------------|-------------|
| 20 | TRINITY_DN26228_c0_g1_i7 | short chain dehydrogenase gsfK-like             | GSFK      | 1  | 1  | 1.63 | -2.24 | -5.82 | <b>0.03</b> | 0.25        | 0.34        |
| 21 | TRINITY_DN36364_c0_g1_i7 | tubulin alpha-1A chain                          | TUBA1A    | 4  | 4  | 1.62 | 0.86  | -1.22 | 0.72        | 0.71        | 0.64        |
| 22 | TRINITY_DN37921_c1_g2_i2 | keratin, type I cytoskeletal 24-like            | KRT24     | 8  | 8  | 1.6  | 1.4   | -0.5  | 0.61        | 0.58        | 0.07        |
| 23 | TRINITY_DN34661_c0_g1_i3 | phosphoglucomutase-1 isoform X2                 | PGM1      | 7  | 11 | 1.55 | 1.58  | -1.01 | 0.46        | 0.23        | 0.07        |
| 24 | TRINITY_DN27002_c0_g1_i1 | actin, cytoplasmic 2                            | ACTG1     | 21 | 48 | 1.52 | 1.19  | -0.44 | 0.69        | 0.53        | 0.30        |
| 25 | TRINITY_DN32459_c0_g1_i1 | calpain small subunit 1                         | CAPNS1    | 1  | 1  | 1.52 | -0.46 | -4.13 | 0.08        | <b>0.03</b> | 1.27        |
| 26 | TRINITY_DN21930_c0_g2_i3 | Proteasome subunit beta type-2                  | PSMB2     | 1  | 1  | 1.45 | -0.72 | -2.97 | 0.11        | <b>0.02</b> | 0.14        |
| 27 | TRINITY_DN20734_c0_g4_i1 | Actin alpha cardiac muscle 1                    | ACTC1     | 23 | 65 | 1.41 | 1.57  | -1.00 | 0.53        | 0.37        | 0.36        |
| 28 | TRINITY_DN34313_c0_g1_i4 | ATP synthase subunit alpha, mitochondrial       | ATP1      | 2  | 2  | 1.35 | 0.53  | -1.18 | <b>0.02</b> | <b>0.04</b> | 0.09        |
| 29 | TRINITY_DN29508_c0_g1_i2 | TRINITY_DN29508_c0_g1_i2                        | N/A       | 1  | 1  | 1.31 | 0.91  | -1.34 | 0.10        | 0.06        | 0.08        |
| 30 | TRINITY_DN37043_c2_g2_i2 | creatine kinase M-type                          | CKM       | 9  | 16 | 1.28 | 1.04  | -1.61 | 0.60        | 0.58        | 0.42        |
| 31 | TRINITY_DN27922_c3_g1_i4 | adenylate kinase isoenzyme 1 isoform X1         | AK1       | 3  | 6  | 1.26 | -0.39 | -1.29 | 1.00        | 0.73        | 0.42        |
| 32 | TRINITY_DN33300_c0_g3_i4 | TRINITY_DN33300_c0_g3_i4                        | N/A       | 13 | 22 | 1.26 | 0.56  | -1.68 | 0.54        | 0.56        | 0.72        |
| 33 | TRINITY_DN36070_c0_g2_i4 | LIM domain-binding protein 3 isoform X12        | LDB3      | 2  | 2  | 1.15 | 0.30  | -1.17 | 0.25        | 0.14        | 0.40        |
| 34 | TRINITY_DN28295_c1_g2_i4 | polyubiquitin-C                                 | UBC       | 1  | 1  | 1.14 | 2.13  | -0.29 | 0.84        | 0.76        | 0.15        |
| 35 | TRINITY_DN37255_c1_g2_i2 | leukotriene A-4 hydrolase                       | LKA4      | 1  | 1  | 1.13 | 1.51  | 0.23  | 0.22        | 0.25        | 0.11        |
| 36 | TRINITY_DN38343_c2_g2_i1 | myosin-1B-like isoform X5                       | MYO1B     | 35 | 60 | 1.08 | 1.45  | -1.12 | 1.15        | 0.31        | 0.56        |
| 37 | TRINITY_DN34296_c3_g8_i1 | actin, alpha cardiac muscle 1                   | ACTC1     | 15 | 43 | 1.07 | 1.23  | -0.58 | 0.36        | 0.42        | 0.41        |
| 38 | TRINITY_DN23035_c0_g2_i2 | dihydrolipoyl dehydrogenase, mitochondrial      | DLD       | 3  | 3  | 1.1  | 0.5   | -0.7  | 0.98        | 0.76        | 0.06        |
| 39 | TRINITY_DN33310_c0_g1_i2 | histone H2A type 2-B-like                       | HIST2H2AB | 1  | 1  | 1.07 | -0.88 | -1.71 | 1.09        | 0.84        | 0.50        |
| 40 | TRINITY_DN38292_c1_g1_i4 | troponin I, fast skeletal muscle                | TNNI2     | 4  | 5  | 1.06 | 0.77  | -0.96 | 1.27        | 0.42        | 0.50        |
| 41 | TRINITY_DN32404_c3_g1_i6 | actin aortic smooth muscle                      | ACTA2     | 19 | 53 | 1.06 | 0.61  | -1.32 | 0.62        | 0.28        | 0.33        |
| 42 | TRINITY_DN30191_c0_g7_i1 | F-actin-capping protein subunit beta isoform X2 | CAPZB     | 1  | 1  | 1.00 | -0.30 | -3.88 | <b>0.05</b> | 0.06        | 0.14        |
| 43 | TRINITY_DN28501_c1_g1_i4 | synaptic vesicle membrane protein VAT-1 homolog | VAT1      | 1  | 1  | 0.99 | 0.32  | -1.00 | <b>0.03</b> | 0.10        | <b>0.04</b> |

|    |                          |                                          |              |    |    |      |       |       |             |             |             |
|----|--------------------------|------------------------------------------|--------------|----|----|------|-------|-------|-------------|-------------|-------------|
| 44 | TRINITY_DN28891_c0_g1_i2 | malate dehydrogenase, mitochondrial      | MDH2         | 2  | 2  | 0.98 | 0.00  | -2.67 | 0.06        | 0.11        | 0.36        |
| 45 | TRINITY_DN32432_c1_g2_i2 | myozenin-1 isoform X1                    | MYOZ1        | 4  | 5  | 1.0  | 1.1   | -1.2  | 0.6         | 0.6         | 0.3         |
| 46 | TRINITY_DN28342_c0_g1_i2 | myosin heavy chain, skeletal muscle-like | MYH          | 9  | 13 | 0.97 | 1.56  | -0.36 | 1.05        | 0.42        | 0.45        |
| 47 | TRINITY_DN27358_c0_g1_i3 | glutathione S-transferase-like           | GST          | 2  | 2  | 0.92 | -1.65 | -4.33 | 0.14        | 0.31        | <b>0.03</b> |
| 48 | TRINITY_DN27718_c1_g2_i1 | desmin                                   | DES          | 4  | 5  | 0.92 | 0.42  | -0.87 | 0.44        | 0.23        | 0.13        |
| 49 | TRINITY_DN36557_c1_g1_i2 | fructose-bisphosphate aldolase C         | ALDOC        | 5  | 7  | 0.86 | 0.88  | -1.57 | 0.62        | 0.29        | 1.06        |
| 50 | TRINITY_DN22922_c0_g1_i4 | galectin-3 isoform X2                    | LGALS3       | 1  | 1  | 0.81 | -0.34 | -2.48 | <b>0.00</b> | 0.08        | 0.09        |
| 51 | TRINITY_DN34182_c1_g1_i1 | TRINITY_DN34182_c1_g1_i1                 | N/A          | 20 | 68 | 0.80 | 0.93  | -0.54 | 0.63        | 0.42        | 0.28        |
| 52 | TRINITY_DN22784_c0_g1_i2 | TRINITY_DN22784_c0_g1_i2                 | N/A          | 13 | 20 | 0.79 | 0.15  | -3.16 | 0.55        | 0.37        | 0.81        |
| 53 | TRINITY_DN29857_c1_g1_i1 | phosphoglycerate kinase 1                | PGK1         | 3  | 4  | 0.8  | 0.8   | -1.0  | <b>0.03</b> | 0.07        | <b>0.02</b> |
| 54 | TRINITY_DN37459_c2_g1_i2 | alpha-actinin-2 isoform X1               | LOC100179322 | 16 | 17 | 0.77 | 1.79  | -0.15 | 0.88        | 0.75        | 0.72        |
| 55 | TRINITY_DN37078_c1_g1_i8 | cytosol aminopeptidase                   | LAP3         | 1  | 1  | 0.69 | 1.59  | 0.63  | 0.34        | 0.44        | 0.21        |
| 56 | TRINITY_DN33047_c0_g1_i1 | heat shock protein HSP 90-alpha          | HSP90AA1     | 2  | 2  | 0.68 | 0.86  | -0.62 | 0.94        | <b>0.04</b> | <b>0.01</b> |
| 57 | TRINITY_DN37032_c0_g2_i1 | heat shock cognate 71 kDa protein        | HSPA8        | 1  | 1  | 0.67 | 0.85  | -0.92 | 0.93        | 0.57        | 0.45        |
| 58 | TRINITY_DN34564_c0_g1_i6 | annexin A6 isoform X1                    | ANXA6        | 1  | 1  | 0.64 | 0.80  | -0.93 | 0.81        | 0.77        | 0.25        |
| 59 | TRINITY_DN28342_c0_g2_i2 | heat shock cognate 71 kDa protein-like   | HSPA8        | 2  | 2  | 0.61 | 0.90  | -0.54 | 0.82        | 0.42        | 0.12        |
| 60 | TRINITY_DN38304_c0_g1_i4 | TRINITY_DN38304_c0_g1_i4                 | N/A          | 1  | 1  | 0.60 | -0.22 | -2.08 | 1.16        | 0.06        | 1.17        |
| 61 | TRINITY_DN29028_c0_g2_i3 | phosphoglycerate mutase 1                | PGAM1        | 6  | 8  | 0.58 | 1.12  | 0.31  | 0.54        | 1.05        | 0.23        |
| 62 | TRINITY_DN27789_c2_g1_i2 | phosphoglycerate mutase 2                | PGAM2        | 5  | 12 | 0.54 | -0.16 | -3.49 | <b>0.02</b> | 0.10        | 0.06        |
| 63 | TRINITY_DN26466_c0_g2_i5 | Protein O-GlcNAcase                      | OGA          | 10 | 16 | 0.50 | 0.64  | 0.12  | 0.39        | 0.32        | 0.48        |
| 64 | TRINITY_DN36562_c0_g1_i9 | glutathione S-transferase Mu 1-like      | GSTM1        | 2  | 4  | 0.49 | -0.01 | -1.11 | 0.31        | 0.12        | 0.55        |
| 65 | TRINITY_DN31350_c0_g1_i3 | peroxiredoxin-6                          | PRDX6        | 1  | 1  | 0.49 | -0.63 | -3.76 | <b>0.03</b> | <b>0.01</b> | 0.28        |
| 66 | TRINITY_DN28781_c0_g1_i3 | pyruvate kinase PKM isoform X2           | PKM          | 1  | 1  | 0.47 | 0.77  | -0.55 | 1.45        | 0.86        | 0.28        |
| 67 | TRINITY_DN37517_c6_g2_i1 | parvalbumin beta                         | PVALB        | 3  | 3  | 0.46 | 1.66  | -1.51 | 0.31        | 1.30        | 0.51        |

|    |                          |                                                                      |          |    |    |       |       |       |             |             |             |
|----|--------------------------|----------------------------------------------------------------------|----------|----|----|-------|-------|-------|-------------|-------------|-------------|
| 68 | TRINITY_DN26606_c2_g2_i1 | F-actin-capping protein subunit alpha-2                              | CAPZA2   | 1  | 1  | 0.45  | -0.39 | -3.42 | 0.07        | 0.08        | <b>0.01</b> |
| 69 | TRINITY_DN37046_c1_g1_i4 | pyruvate kinase PKM isoform X1                                       | PKM      | 6  | 6  | 0.45  | 1.01  | -0.96 | 0.58        | 0.33        | 0.39        |
| 70 | TRINITY_DN33370_c2_g2_i3 | keratin, type II cytoskeletal 5-like                                 | KRT5     | 7  | 8  | 0.4   | 0.8   | -0.6  | 0.15        | 0.31        | 0.29        |
| 71 | TRINITY_DN34011_c0_g1_i3 | myosin-1B-like isoform X2                                            | MYO1B    | 2  | 3  | 0.44  | 0.83  | -4.91 | <b>0.00</b> | <b>0.01</b> | 0.05        |
| 72 | TRINITY_DN29832_c0_g2_i2 | PDZ and LIM domain protein 5 isoform X2                              | PDLIM5   | 2  | 3  | 0.39  | -0.64 | -3.40 | 0.14        | 0.14        | 0.20        |
| 73 | TRINITY_DN37554_c1_g1_i2 | glycogen phosphorylase, muscle form                                  | PYGM     | 16 | 27 | 0.38  | 0.70  | -1.66 | 0.50        | 0.34        | 0.45        |
| 74 | TRINITY_DN22345_c2_g1_i1 | Parvalbumin alpha                                                    | PVALB    | 2  | 3  | 0.37  | 1.78  | -0.06 | 1.18        | 0.55        | 0.97        |
| 75 | TRINITY_DN29856_c0_g1_i2 | carbonyl reductase [NADPH] 1-like                                    | CBR1     | 1  | 1  | 0.33  | -0.65 | -3.32 | <b>0.04</b> | 0.09        | 0.15        |
| 76 | TRINITY_DN34096_c0_g1_i3 | aldose reductase-like                                                | AR       | 2  | 3  | 0.33  | -0.49 | -3.31 | <b>0.03</b> | <b>0.03</b> | 0.27        |
| 77 | TRINITY_DN38029_c0_g1_i4 | collagen alpha-1(I) chain                                            | COL1A1   | 26 | 30 | 0.28  | -0.18 | -0.45 | 0.28        | 0.81        | 1.02        |
| 78 | TRINITY_DN37645_c3_g2_i1 | myosin regulatory light chain 2, skeletal muscle isoform             | MYLPF    | 2  | 4  | 0.26  | 2.91  | -0.65 | <b>0.05</b> | 0.07        | 0.10        |
| 79 | TRINITY_DN22413_c0_g2_i1 | N-acetylneuraminase lyase                                            | NPL      | 3  | 6  | 0.18  | 1.11  | 0.86  | 0.30        | 0.92        | 0.91        |
| 80 | TRINITY_DN32810_c4_g1_i4 | fructose-bisphosphate aldolase A                                     | ALDOA    | 8  | 35 | 0.18  | 1.34  | -0.71 | 0.41        | 0.42        | 0.52        |
| 81 | TRINITY_DN32365_c1_g2_i2 | myozenin-3                                                           | MYOZ3    | 1  | 1  | 0.11  | -0.55 | -3.38 | 0.07        | 0.10        | 0.27        |
| 82 | TRINITY_DN37786_c0_g1_i2 | collagen alpha-1(VI) chain                                           | COL6A1   | 5  | 5  | 0.04  | 0.21  | -1.95 | 0.22        | 0.47        | 1.20        |
| 83 | TRINITY_DN34741_c2_g2_i1 | heat shock protein HSP 90-beta                                       | HSP90AB1 | 2  | 2  | 0.03  | 0.81  | -1.10 | 0.11        | 0.08        | 0.08        |
| 84 | TRINITY_DN26737_c2_g1_i1 | myosin-3-like isoform X7                                             | MYH3     | 12 | 17 | -0.01 | 1.09  | -0.84 | 0.74        | 0.17        | 0.62        |
| 85 | TRINITY_DN33401_c0_g2_i2 | complement component 1 Q subcomponent-binding protein, mitochondrial | C1QBP    | 1  | 1  | -0.02 | -0.30 | -2.58 | <b>0.03</b> | <b>0.02</b> | 0.17        |
| 86 | TRINITY_DN29973_c3_g1_i6 | troponin T, fast skeletal muscle isoform X1                          | TNNT3    | 3  | 10 | -0.08 | -0.24 | -3.64 | 0.35        | 0.07        | 0.34        |
| 87 | TRINITY_DN37310_c1_g1_i4 | plectin isoform X4                                                   | PLEC1    | 1  | 1  | -0.08 | 0.45  | -0.76 | <b>0.00</b> | <b>0.04</b> | <b>0.04</b> |
| 88 | TRINITY_DN37095_c3_g2_i3 | triosephosphate isomerase                                            | TPI1     | 8  | 14 | -0.09 | -0.34 | -5.37 | 1.20        | 0.52        | 0.70        |
| 89 | TRINITY_DN29661_c3_g1_i3 | tropomyosin alpha-3 chain isoform X1                                 | TPM3     | 7  | 8  | -0.17 | -0.11 | -4.27 | 0.19        | <b>0.03</b> | 0.06        |

|     |                           |                                                          |         |    |    |       |       |       |             |             |             |
|-----|---------------------------|----------------------------------------------------------|---------|----|----|-------|-------|-------|-------------|-------------|-------------|
| 90  | TRINITY_DN35037_c0_g1_i3  | glucose-6-phosphate isomerase                            | GPI     | 3  | 3  | -0.18 | 0.54  | -0.90 | 0.39        | 0.12        | 0.05        |
| 91  | TRINITY_DN37574_c0_g1_i1  | ubiquitin-like modifier-activating enzyme 1              | UBA1    | 1  | 1  | -0.18 | 1.09  | -1.11 | <b>0.03</b> | 0.07        | 0.07        |
| 92  | TRINITY_DN35510_c0_g1_i3  | myelin basic protein isoform X2                          | MBP     | 2  | 3  | -0.21 | 0.29  | -1.88 | 0.86        | 0.65        | 0.86        |
| 93  | TRINITY_DN32170_c0_g3_i2  | glycerol-3-phosphate dehydrogenase [NAD(+)], cytoplasmic | GPD1    | 2  | 2  | -0.23 | -0.37 | -3.79 | 0.62        | 0.38        | <b>0.01</b> |
| 94  | TRINITY_DN37021_c1_g1_i5  | alpha-enolase isoform X1                                 | ENO1    | 12 | 17 | -0.23 | 1.01  | -1.30 | 0.75        | 0.60        | 0.32        |
| 95  | TRINITY_DN16558_c0_g2_i1  | collagen alpha-3(VI) chain isoform X10                   | COL6A3  | 1  | 1  | -0.23 | 0.37  | -2.25 | 0.44        | 0.44        | 0.43        |
| 96  | TRINITY_DN37508_c1_g1_i1  | collagen alpha-2(I) chain                                | COL1A2  | 14 | 18 | -0.27 | -0.43 | -2.40 | 0.54        | 0.84        | 0.08        |
| 97  | TRINITY_DN28227_c0_g1_i2  | ADP/ATP translocase 3                                    | SLC25A6 | 1  | 1  | -0.32 | 0.49  | -1.24 | <b>0.03</b> | <b>0.00</b> | 0.07        |
| 98  | TRINITY_DN37706_c0_g3_i4  | periostin isoform X1                                     | POSTN   | 3  | 3  | -0.35 | 0.77  | -1.38 | <b>0.04</b> | <b>0.03</b> | 0.31        |
| 99  | TRINITY_DN36097_c0_g1_i2  | nebulin                                                  | NEB     | 2  | 2  | -0.40 | 0.45  | -1.22 | <b>0.03</b> | <b>0.02</b> | 0.28        |
| 100 | TRINITY_DN26034_c1_g1_i1  | transitional endoplasmic reticulum ATPase-like           | VCP     | 1  | 1  | -0.42 | 0.80  | -0.85 | 0.14        | 0.08        | 0.20        |
| 101 | TRINITY_DN18038_c1_g2_i1  | collagen alpha-1(XV) chain isoform X1                    | COL15A1 | 1  | 2  | -0.44 | 0.65  | -1.92 | 0.14        | <b>0.03</b> | 0.10        |
| 102 | TRINITY_DN37512_c1_g1_i6_ | hydroperoxide isomerase ALOXE3-like                      | ALOXE3  | 2  | 4  | -0.5  | 0.2   | -1.7  | 0.28        | 0.30        | 0.08        |
| 103 | TRINITY_DN35151_c1_g3_i3  | desmocollin-1 isoform X1                                 | DSC1    | 1  | 5  | -0.54 | 0.28  | -0.72 | 0.22        | 0.20        | 0.36        |
| 104 | TRINITY_DN18988_c0_g3_i1  | titin-like isoform X23                                   | TTN     | 2  | 2  | -0.55 | 0.72  | -1.28 | 0.19        | 0.16        | 0.12        |
| 105 | TRINITY_DN37493_c2_g1_i1  | myosin-7B isoform X2                                     | MYH7B   | 16 | 30 | -0.61 | 0.60  | -0.50 | 0.09        | <b>0.02</b> | 0.71        |
| 106 | TRINITY_DN38339_c2_g3_i1  | titin isoform X19                                        | TTN     | 9  | 11 | -0.6  | 0.8   | -1.6  | <b>0.05</b> | 0.13        | 0.23        |
| 107 | TRINITY_DN38338_c2_g1_i4  | myosin-7-like                                            | MYH7    | 6  | 7  | -0.62 | -0.10 | 1.22  | 0.07        | 0.62        | 0.25        |
| 108 | TRINITY_DN38296_c2_g1_i3_ | ryanodine receptor 1                                     | RYR1    | 1  | 1  | -0.6  | 0.8   | -1.0  | <b>0.01</b> | 0.05        | 0.32        |
| 109 | TRINITY_DN38142_c2_g2_i1  | myomesin-2                                               | MYOM1   | 6  | 7  | -0.66 | 0.35  | -1.61 | <b>0.02</b> | 0.07        | 0.08        |
| 110 | TRINITY_DN37478_c0_g1_i2  | glyceraldehyde-3-phosphate dehydrogenase 2               | GAPDHS  | 8  | 8  | -0.67 | 0.03  | -3.11 | 0.57        | 0.30        | 0.90        |
| 111 | TRINITY_DN19098_c0_g1_i1  | collagen alpha-2(VI) chain isoform X1                    | COL6A2  | 2  | 3  | -0.67 | 0.72  | -0.73 | <b>0.03</b> | 0.11        | <b>0.03</b> |
| 112 | TRINITY_DN38157_c0_g1_i1  | myomesin-1 isoform X2                                    | MYOM1   | 2  | 2  | -0.72 | 0.62  | -1.58 | <b>0.02</b> | <b>0.00</b> | <b>0.00</b> |
| 113 | TRINITY_DN36747_c0_g1_i5  | AMP deaminase 1                                          | AMPD1   | 2  | 2  | -0.78 | 0.46  | -0.70 | <b>0.01</b> | <b>0.01</b> | 0.11        |

|     |                          |                                                                |        |    |    |       |       |       |             |             |             |
|-----|--------------------------|----------------------------------------------------------------|--------|----|----|-------|-------|-------|-------------|-------------|-------------|
| 114 | TRINITY_DN38132_c4_g1_i1 | sarcoplasmic/endoplasmic reticulum calcium ATPase 1 isoform X2 | ATP2A1 | 16 | 21 | -0.80 | 0.77  | -1.72 | <b>0.02</b> | <b>0.05</b> | <b>0.02</b> |
| 115 | TRINITY_DN38343_c2_g1_i2 | myosin-1B-like isoform X4                                      | MYO1B  | 19 | 42 | -0.8  | 1.3   | -2.1  | 0.11        | 0.32        | 0.17        |
| 116 | TRINITY_DN25656_c0_g1_i1 | myosin-3 isoform X1                                            | MYH3   | 12 | 16 | -0.89 | 0.97  | -1.44 | <b>0.03</b> | <b>0.01</b> | <b>0.05</b> |
| 117 | TRINITY_DN37664_c1_g1_i1 | myosin-binding protein C, fast-type                            | MYBPC2 | 8  | 10 | -0.95 | 1.01  | -1.13 | 0.77        | 0.14        | 0.12        |
| 118 | TRINITY_DN37754_c1_g1_i3 | synaptophysin-like protein 2                                   | SYPL2  | 1  | 2  | -0.96 | 0.69  | -2.25 | <b>0.03</b> | <b>0.01</b> | 0.13        |
| 119 | TRINITY_DN38316_c1_g1_i3 | nebulin isoform X9                                             | NEB    | 14 | 15 | -1.05 | -0.16 | -1.30 | 0.25        | 0.39        | 0.30        |
| 120 | TRINITY_DN36517_c0_g2_i1 | ATP-dependent 6-phosphofructokinase, muscle type               | PFKM   | 10 | 14 | -1.06 | 0.71  | -1.32 | <b>0.02</b> | <b>0.02</b> | <b>0.04</b> |
| 121 | TRINITY_DN38333_c1_g1_i1 | glycogen debranching enzyme isoform X1                         | AGL    | 1  | 1  | -1.09 | 0.74  | -1.60 | <b>0.04</b> | <b>0.03</b> | <b>0.02</b> |
| 122 | TRINITY_DN34542_c0_g1_i4 | ovotransferrin-like isoform X1                                 | TF     | 3  | 3  | -1.12 | 2.41  | -0.36 | 0.21        | 0.19        | 0.16        |
| 123 | TRINITY_DN34011_c0_g1_i1 | myosin heavy chain, skeletal muscle, adult                     | MYH1   | 6  | 11 | -1.34 | 1.52  | -2.63 | 0.37        | 0.23        | 0.16        |
| 124 | TRINITY_DN27696_c0_g2_i4 | alpha-2-macroglobulin-like                                     | A2M    | 2  | 2  | -1.61 | 2.11  | -1.23 | 1.10        | 0.76        | <b>0.04</b> |
| 125 | TRINITY_DN34296_c3_g4_i1 | actin, cytoplasmic 2                                           | ACTB   | 1  | 1  | -1.85 | -0.34 | -1.16 | <b>0.01</b> | <b>0.04</b> | <b>0.04</b> |
| 126 | TRINITY_DN28457_c0_g1_i3 | titin isoform X50                                              | TTN    | 2  | 2  | -2.32 | 1.72  | -1.89 | <b>0.04</b> | <b>0.04</b> | 0.09        |
| 127 | TRINITY_DN33871_c5_g3_i3 | feather keratin B-4-like                                       | FKER   | 2  | 4  | -3.19 | 0.85  | -0.68 | 0.63        | 0.11        | 0.08        |
| 128 | TRINITY_DN31256_c2_g1_i3 | glyceraldehyde-3-phosphate dehydrogenase                       | GAPDH  | 5  | 10 | -4.97 | 1.26  | -1.78 | 0.62        | 0.39        | 1.10        |



Figure 1:

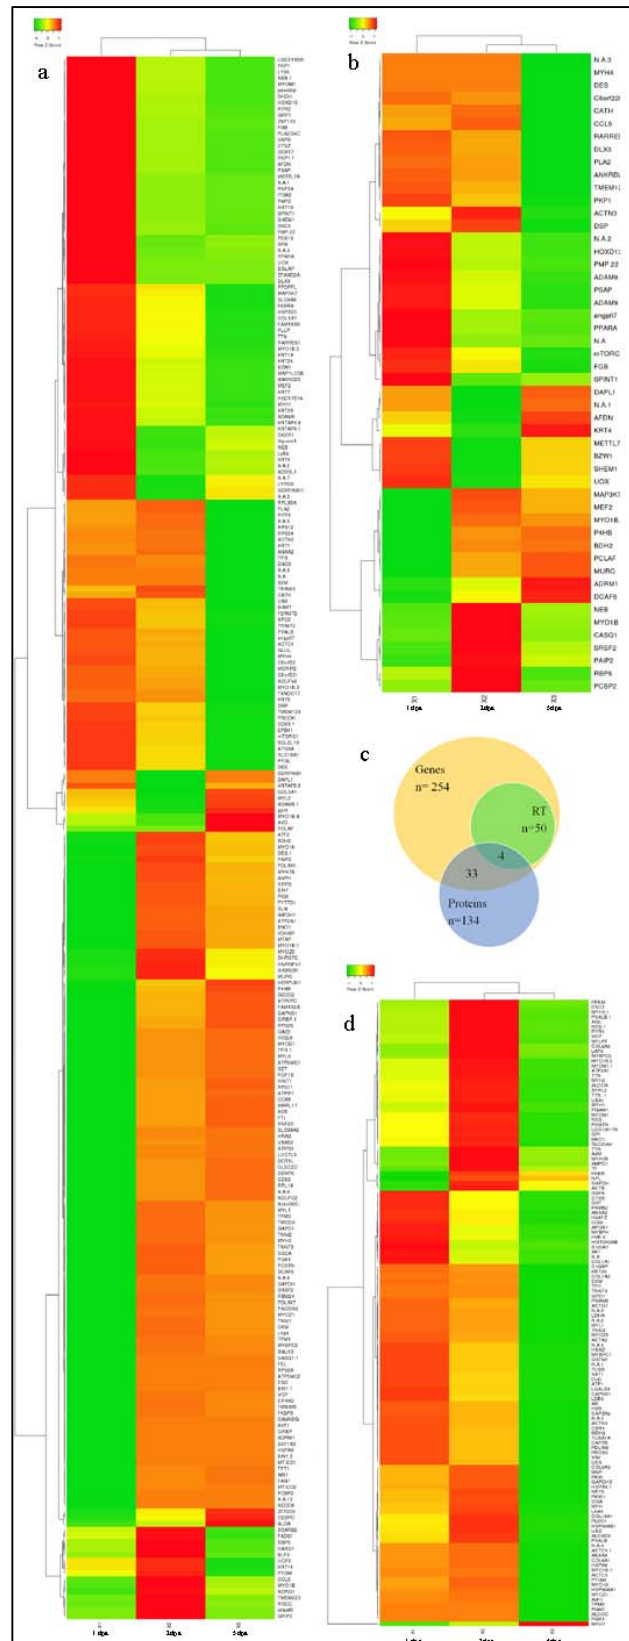



Figure 2:

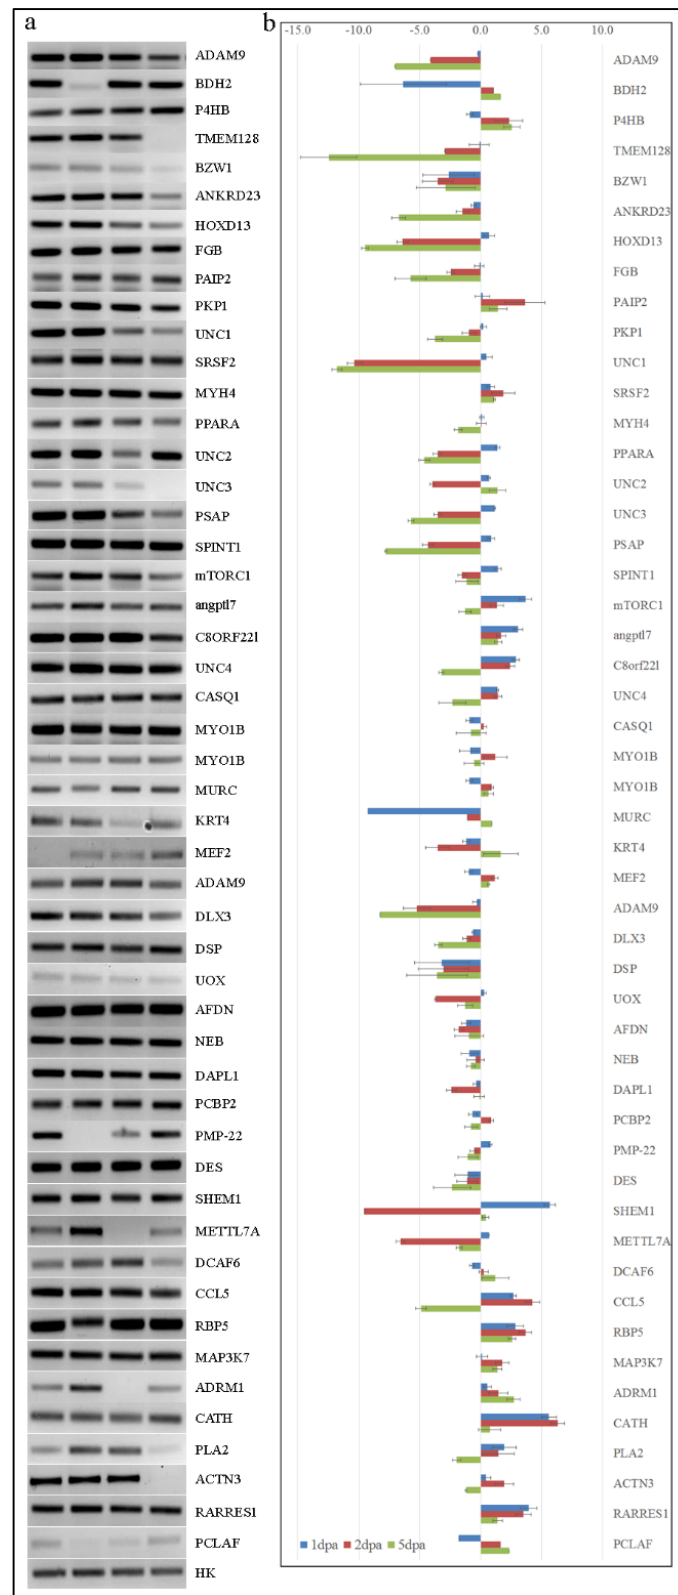

Figure 3:

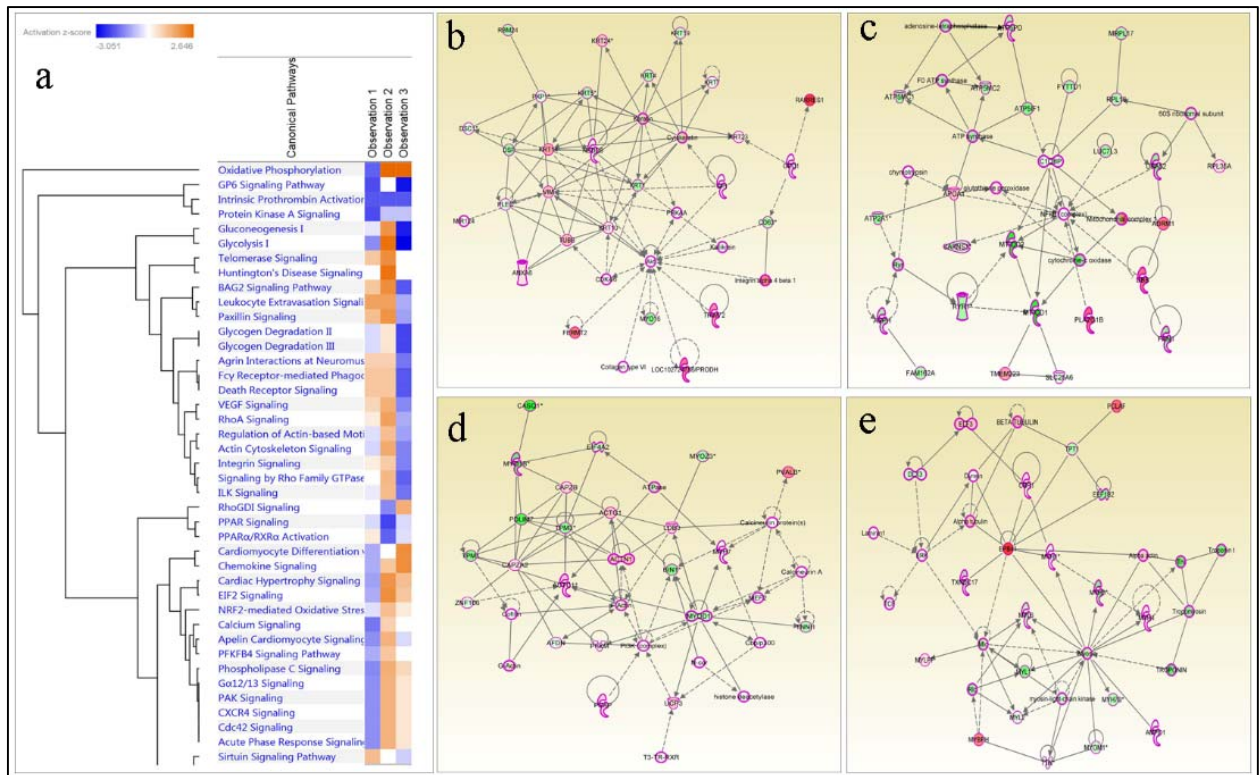



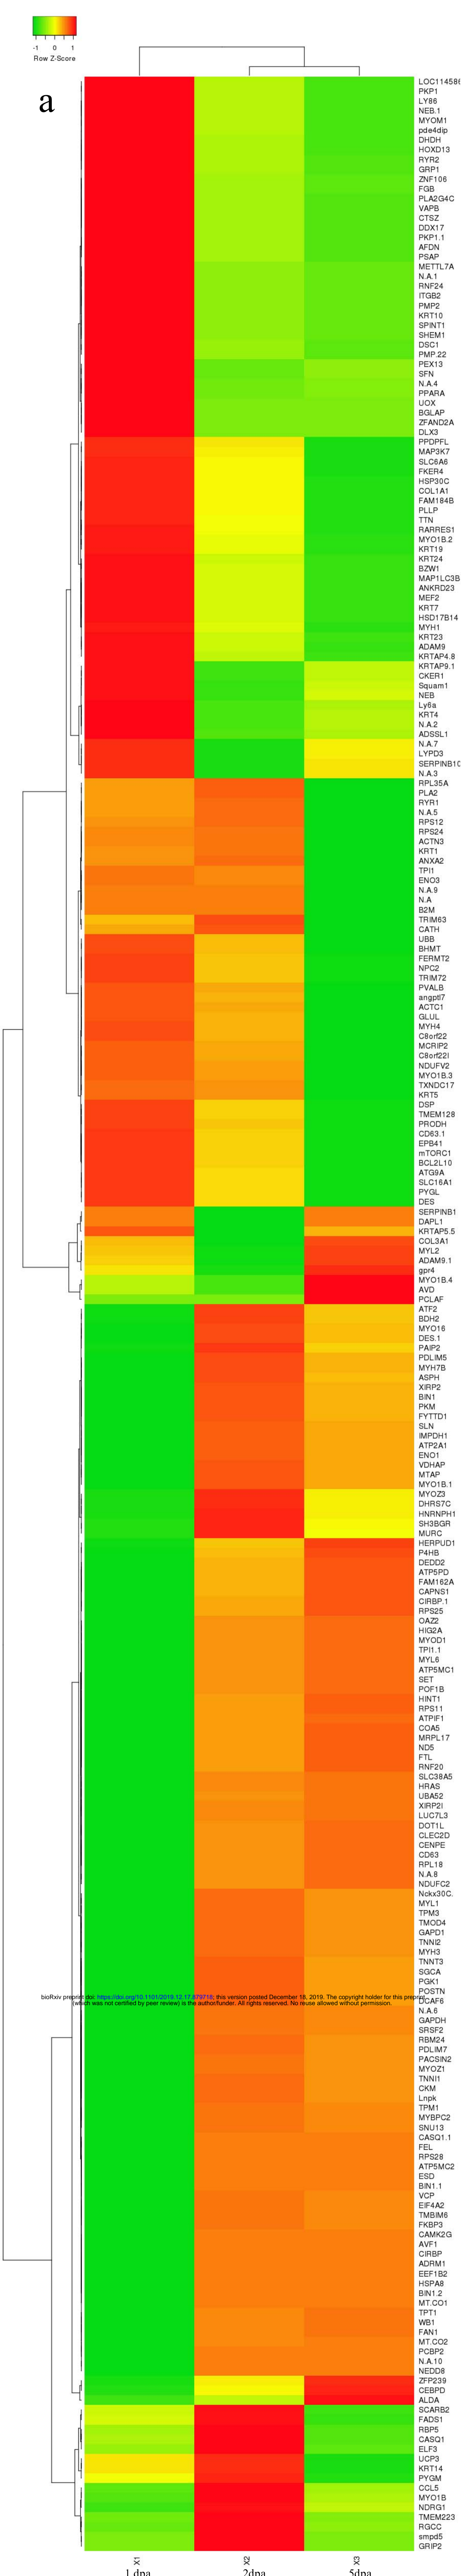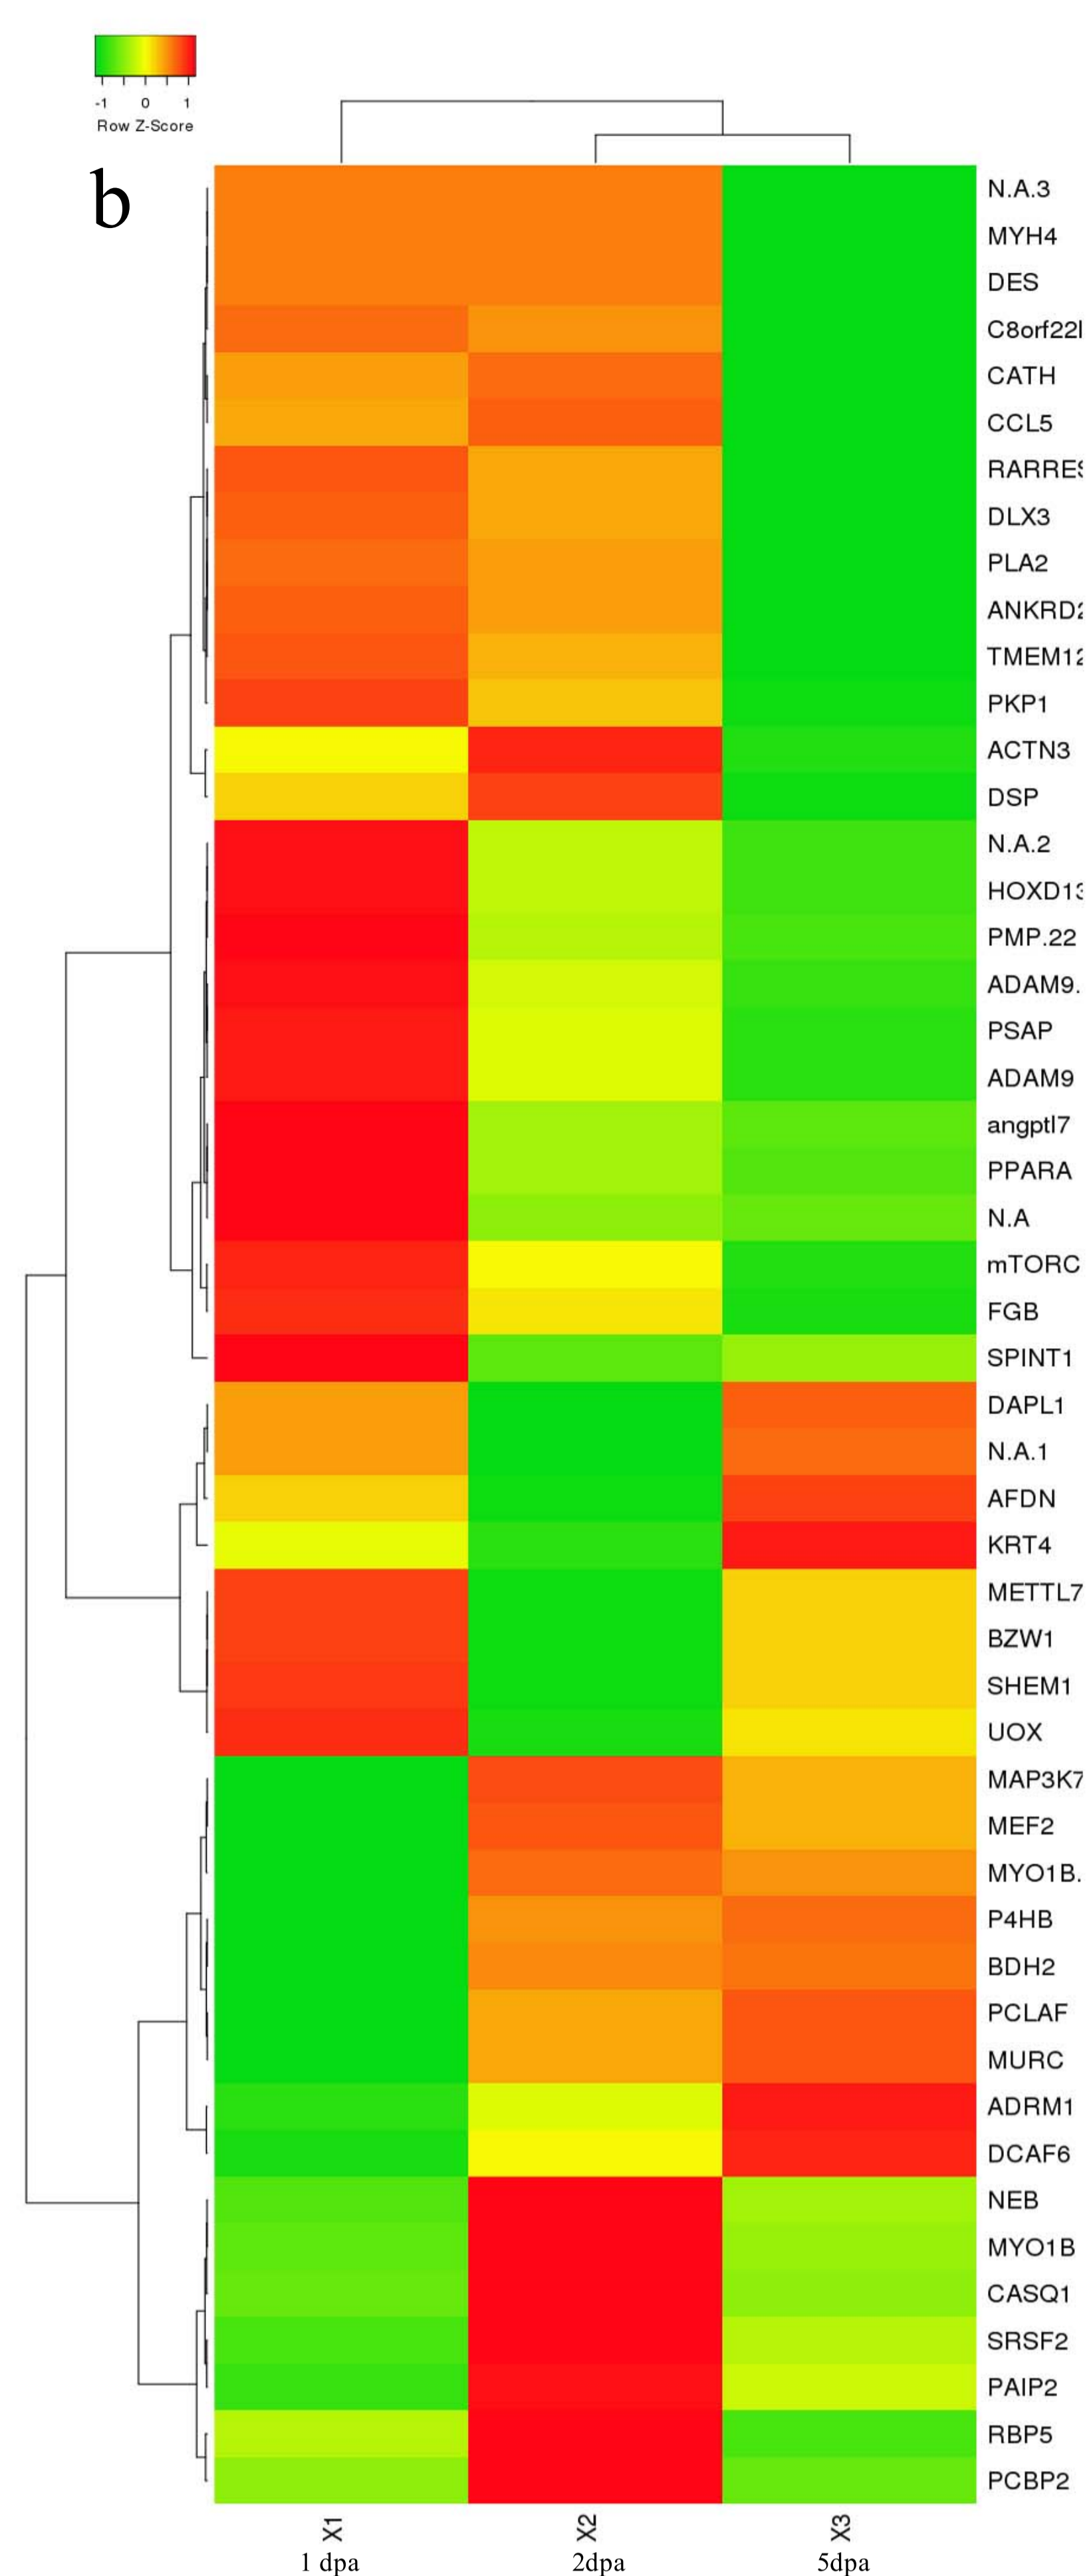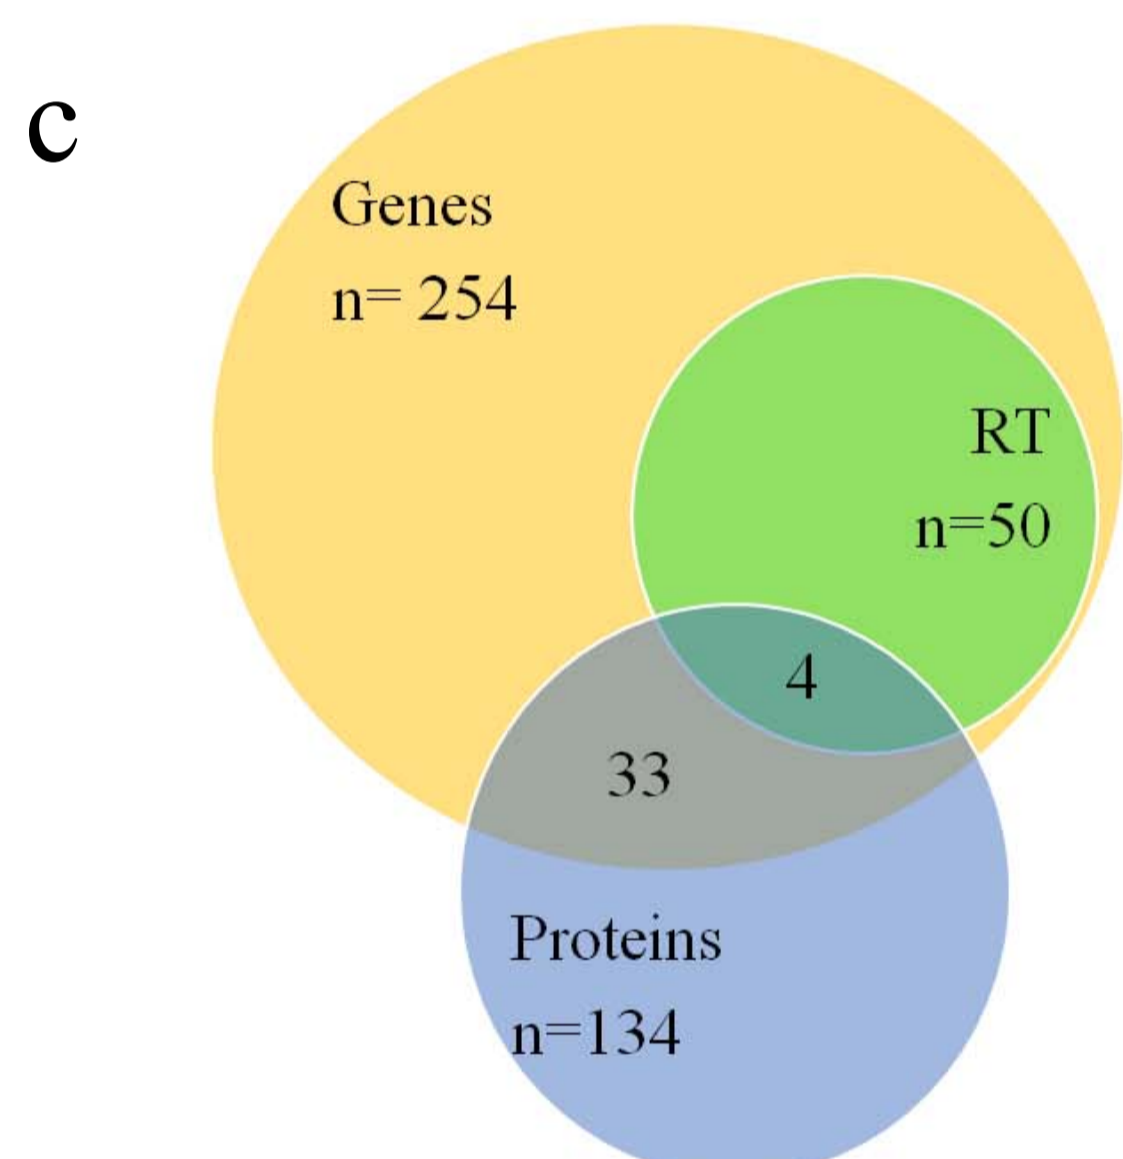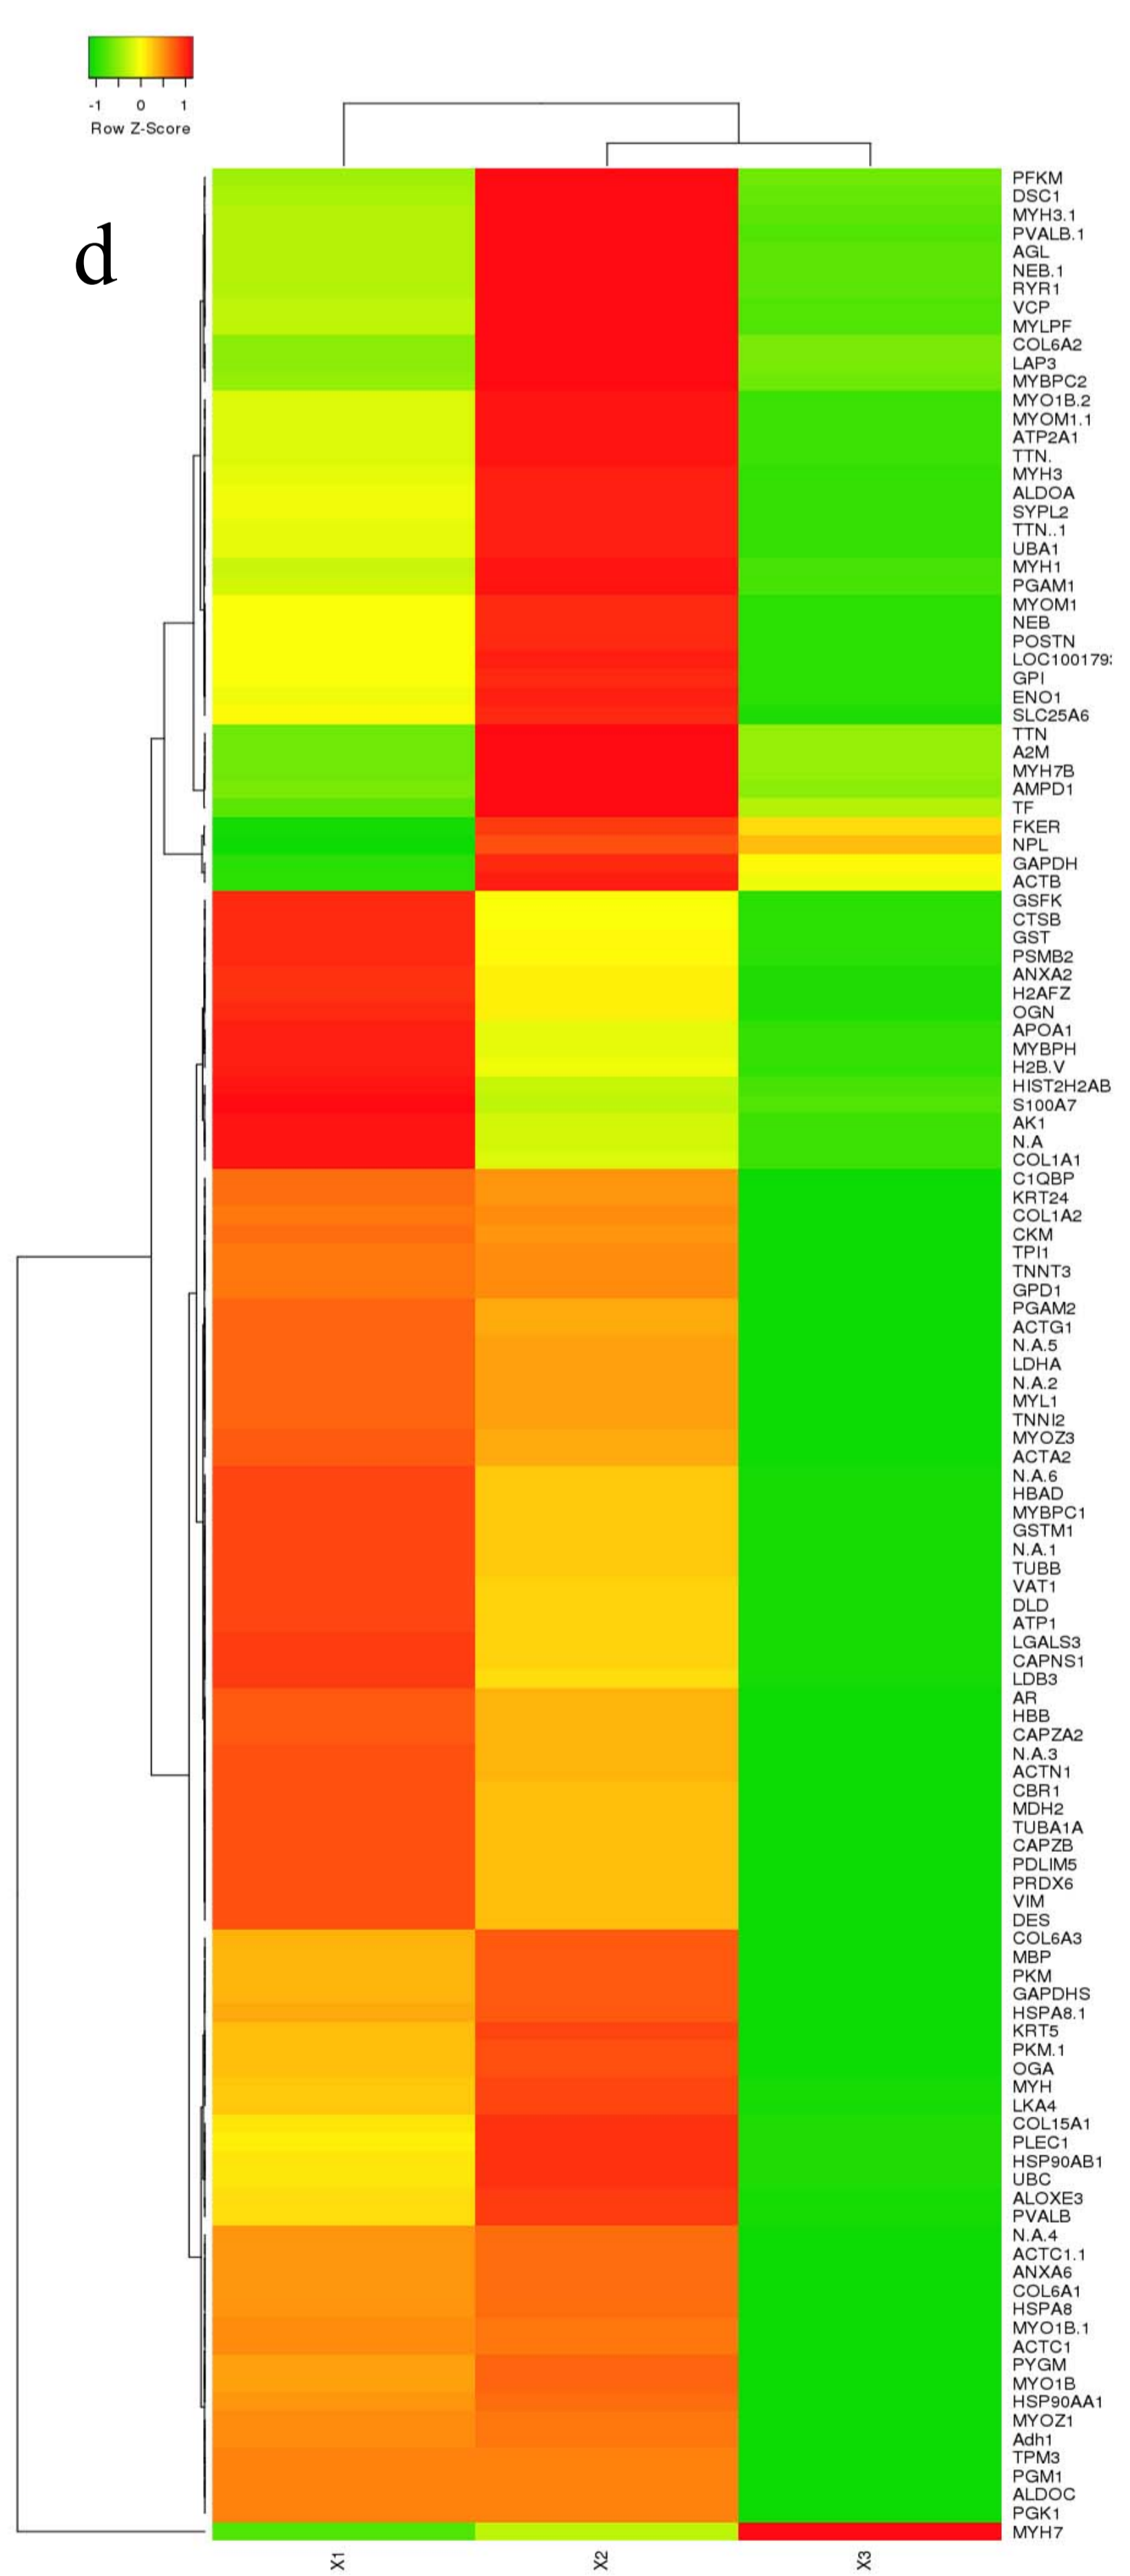



**a**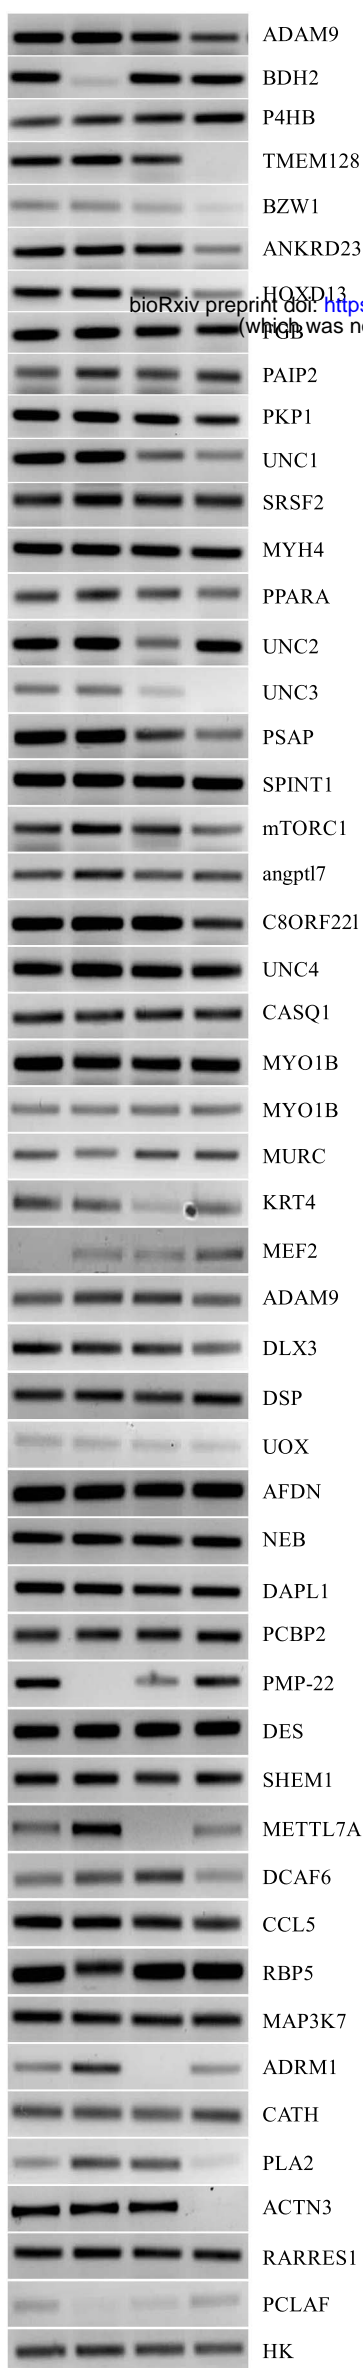**b**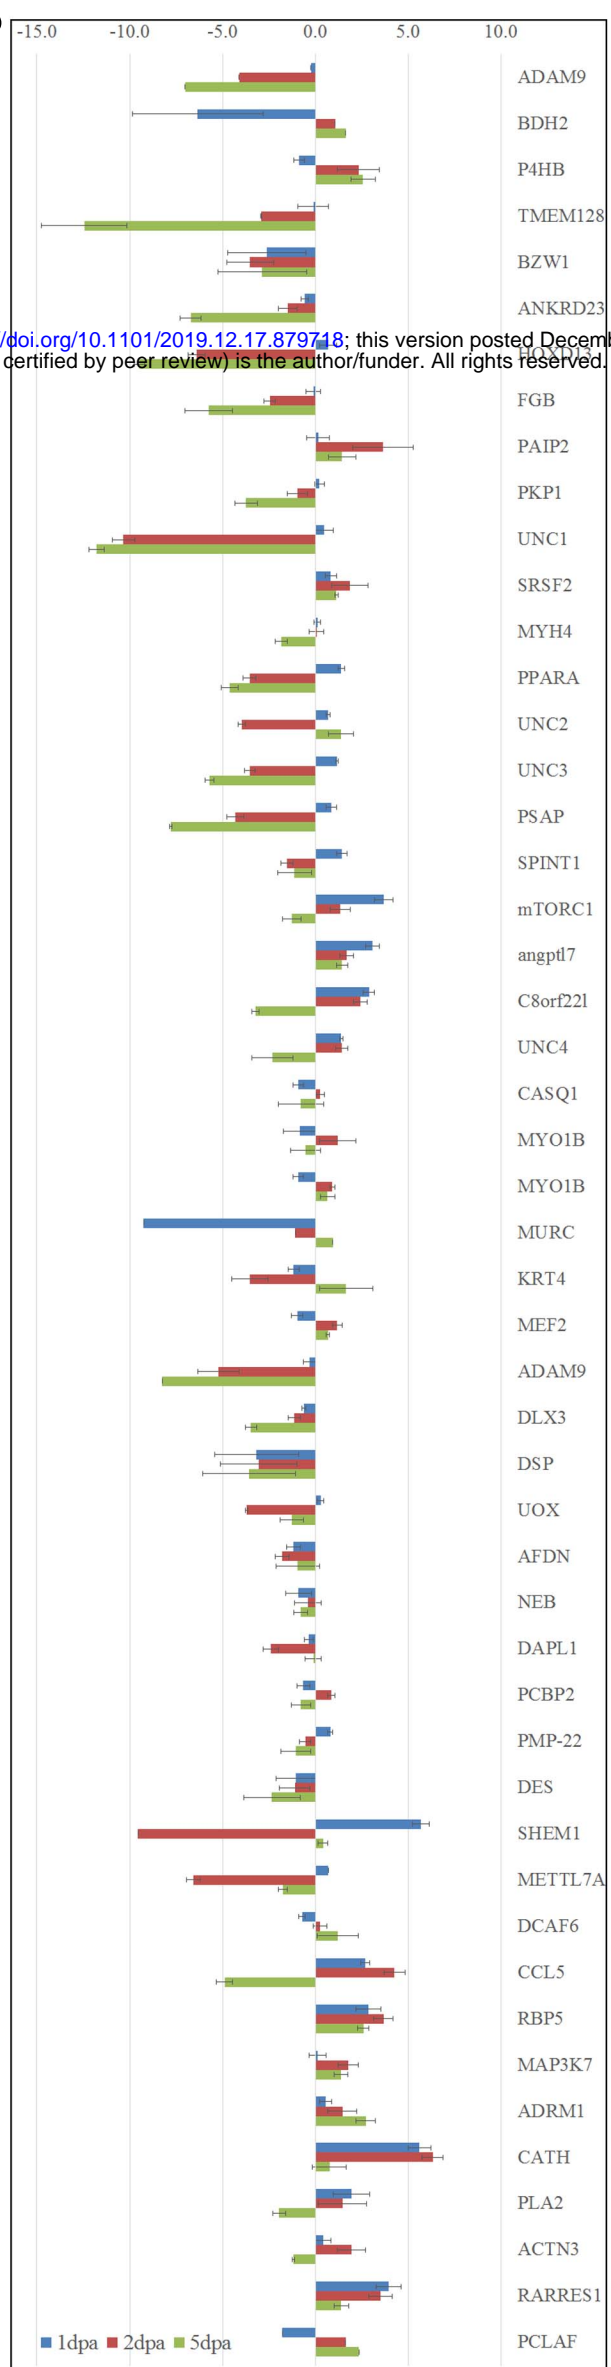

bioRxiv preprint doi: <https://doi.org/10.1101/2019.12.17.879718>; this version posted December 18, 2019. The copyright holder for this preprint (which was not certified by peer review) is the author/funder. All rights reserved. No reuse allowed without permission.
